# Supplementary material for: Novel hybrid-pyrrole derivatives: their synthesis, antitubercular evaluation and docking studies
Source: Royal Society of Chemistry journal article supplement (doi:10.1039/c4ra14440f), 2014-12-19
Supplement: c4ra14440f1.pdf [file c4ra14440f1.pdf]

## Supporting Information

### Novel Hybrid-Pyrrole Derivatives: Their Synthesis, Antitubercular Evaluation and Docking Studies

Rikta Saha, Md. Mumtaz Alam, Mymoona Akhter\*

Drug Design and Medicinal Chemistry Laboratory, Department of Pharmaceutical Chemistry, Faculty of Pharmacy, Jamia Hamdard, New Delhi 110062, India. Ph: +91 11 26059688 x 5645

#### Contents

#### Procedure for the synthesis of 7-Hydroxy-4-methyl-2H-chromen-2-one

#### Scheme 2. Possible mechanism for the formation of 7a-p & 8a-p

#### Supporting Table 1 Physical and analytical data of hybrid-pyrroles (7a-p & 8a-p)

#### Supporting Table 2 Calculation of properties of the compounds (7a-p & 8a-p) computed by Molinspiration property calculator program

#### 7-Hydroxy-4-methyl-2H-chromen-2-one

7-Hydroxy-4-methyl-2H-chromen-2-one was synthesized using the Pechmann reaction, as described in literature. Recorcinol (1.0 g) and ethyl acetoacetate (1.15 mL) were dissolved in sulfuric acid (6 mL) in a round bottom flask at cooling condition. The solution was stirred for 24 h. The mixture was quenched by addition of ice-cold water (30 mL). After 1 hour at 0°C, a precipitate was formed that was filtered off and washed with water, and dried, gave white solid as product.

#### Scheme 2. Possible mechanism for the formation of 7a-p & 8a-p

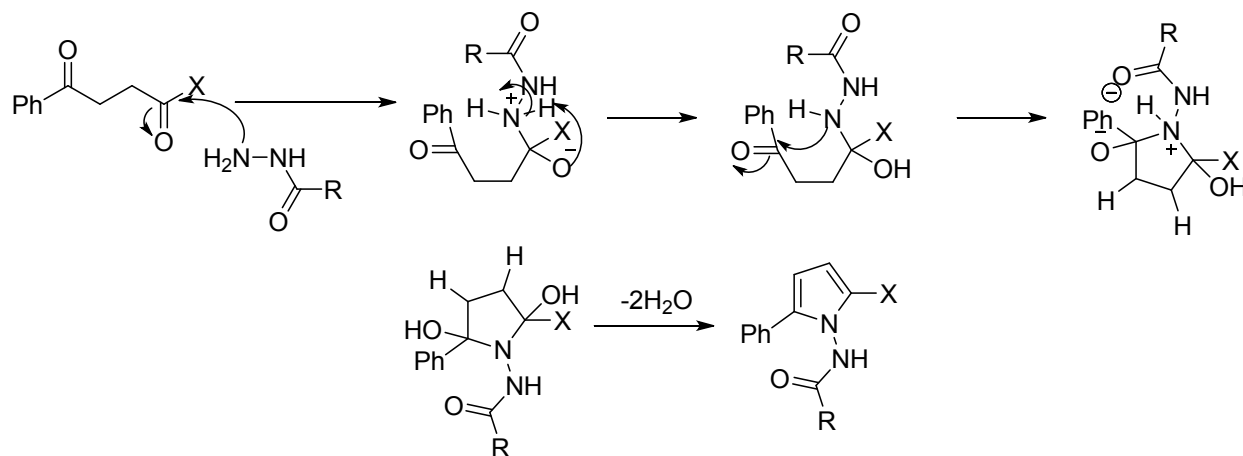

**Supporting Table 1** Physical and analytical data of hybrid-pyrroles (**7a-p** & **8a-p**)

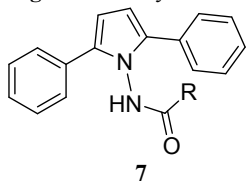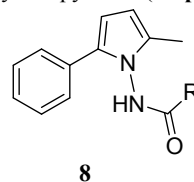

| ID | R | Color         | R <sub>f</sub> <sup>a</sup> | MP(°C)  | Conventional method | Microwave method |
|----|---|---------------|-----------------------------|---------|---------------------|------------------|
|    |   |               |                             |         | Yield/Time(h)       | Yield/Time(min)  |
| 7a |   | White solid   | 0.41                        | 245-246 | 20(12)              | 76(10)           |
| 7b |   | White solid   | 0.42                        | 210-212 | 10(24)              | 79(10)           |
| 7c |   | White solid   | 0.47                        | 214-215 | 70(18)              | 68(10)           |
| 7d |   | Greyish solid | 0.42                        | 206-207 | 20(16)              | 75(10)           |
| 7e |   | White solid   | 0.74                        | 277-274 | 10(24)              | 47(7)            |
| 7f |   | White solid   | 0.45                        | 242-244 | 20(24)              | 47(10)           |
| 7g |   | White solid   | 0.54                        | 275-277 | 10(15)              | 52(10)           |
| 7h |   | Brown solid   | 0.55                        | 176-177 | 24(18)              | 44(10)           |
| 7i |   | White solid   | 0.47                        | 172-174 | 18(10)              | 76(10)           |
| 7j |   | White solid   | 0.54                        | 270-271 | 15(10)              | 67(7)            |
| 7k |   | Greyish solid | 0.42                        | 125-126 | 10(18)              | 55(10)           |
| 7l |   | White solid   | 0.48                        | 172-174 | 0(18)               | 79(15)           |
| 7m |   | White solid   | 0.50                        | 274-275 | 0(18)               | 55(10)           |
| 7n |   | White solid   | 0.48                        | 210-211 | 0(18)               | 50(10)           |
| 7o |   | White solid   | 0.45                        | 200-202 | 21(18)              | 60(8)            |

|           |                                                                                     |                   |       |         |        |        |
|-----------|-------------------------------------------------------------------------------------|-------------------|-------|---------|--------|--------|
| <b>7p</b> | 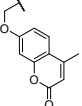   | White solid       | 0.34  | 164-165 | 0(16)  | 50(15) |
| <b>8a</b> |    | White solid       | 0.5   | 210-212 | 16(18) | 76(7)  |
| <b>8b</b> |    | White solid       | 0.5   | 114-116 | 12(24) | 54(10) |
| <b>8c</b> |    | White solid       | 0.5   | 168-170 | 45(18) | 81(10) |
| <b>8d</b> |    | Greyish solid     | 0.4   | 152-154 | 20(24) | 48(10) |
| <b>8e</b> |    | White solid       | 0.5*  | 188-190 | 27(24) | 49(10) |
| <b>8f</b> |    | Off-white solid   | 0.5   | 174-176 | 10(24) | 62(12) |
| <b>8g</b> |    | White solid       | 0.25  | 188-190 | 10(15) | 78(12) |
| <b>8h</b> |    | Light Brown solid | 0.5   | 120-122 | 32(18) | 72(15) |
| <b>8i</b> |   | Greyish solid     | 0.33  | 128-170 | 18(24) | 68(10) |
| <b>8j</b> |  | White solid       | 0.25  | 188-190 | 18(24) | 81(10) |
| <b>8k</b> |  | White solid       | 0.28  | 128-170 | 10(18) | 51(10) |
| <b>8l</b> |  | Brown solid       | 0.5   | 90-92   | 16(18) | 60(10) |
| <b>8m</b> |  | White solid       | 0.33  | 116-118 | 0(18)  | 56(10) |
| <b>8n</b> |  | White solid       | 0.35  | 199-200 | 12(18) | 83(10) |
| <b>8o</b> |  | White solid       | 0.35  | 118-120 | 25(18) | 52(12) |
| <b>8p</b> |  | Off-white solid   | 0.44* | 178-140 | 10(16) | 45(15) |

a: TLC solvent system Hexane : Ethyl acetate 7: 3; \*: TLC solvent system Hexane : Ethyl acetate 5: 5; Yield expressed in percentage

**Supporting Table 2** Calculation of properties of the compounds (**7a-p** & **8a-p**) computed by Molinspiron property calculator program

| Entry                   | TPSA<br>Å <sup>2</sup> | no. of rotatable bond | MW    | MV  | no. of OH, NH donor | no. of ON acceptor | mi LogP <sup>a</sup> |
|-------------------------|------------------------|-----------------------|-------|-----|---------------------|--------------------|----------------------|
| <b>Acceptable range</b> | ☺                      | ☺                     | <500☺ | -   | <5☺                 | <10☺               | <5                   |
| <b>7a</b>               | 34                     | 4                     | 338   | 315 | 1                   | 3                  | 5.05                 |
| <b>7b</b>               | 34                     | 4                     | 352   | 331 | 1                   | 3                  | 5.45                 |
| <b>7c</b>               | 34                     | 4                     | 352   | 331 | 1                   | 3                  | 5.48                 |
| <b>7d</b>               | 34                     | 4                     | 352   | 331 | 1                   | 3                  | 5.50                 |
| <b>7e</b>               | 46                     | 4                     | 339   | 310 | 1                   | 4                  | 3.77☺                |
| <b>7f</b>               | 34                     | 4                     | 417   | 332 | 1                   | 3                  | 5.82                 |
| <b>7g</b>               | 34                     | 4                     | 372   | 328 | 1                   | 3                  | 5.68                 |
| <b>7h</b>               | 34                     | 4                     | 407   | 342 | 1                   | 3                  | 6.34                 |
| <b>7i</b>               | 43                     | 6                     | 368   | 340 | 1                   | 4                  | 5.02                 |
| <b>7j</b>               | 43                     | 5                     | 368   | 340 | 1                   | 4                  | 5.11                 |
| <b>7k</b>               | 34                     | 5                     | 352   | 331 | 1                   | 3                  | 5.15                 |
| <b>7l</b>               | 34                     | 7                     | 422   | 415 | 1                   | 3                  | 7.25                 |
| <b>7m</b>               | 34                     | 5                     | 402   | 375 | 1                   | 3                  | 6.31                 |
| <b>7n</b>               | 43                     | 6                     | 418   | 384 | 1                   | 4                  | 6.21                 |
| <b>7o</b>               | 34                     | 5                     | 366   | 348 | 1                   | 3                  | 5.51                 |
| <b>7p</b>               | 73                     | 6                     | 450   | 401 | 1                   | 6                  | 5.45                 |
| <b>8a</b>               | 34                     | 3                     | 276   | 260 | 1                   | 3                  | 3.60☺                |
| <b>8b</b>               | 34                     | 3                     | 290   | 276 | 1                   | 3                  | 4.00☺                |
| <b>8c</b>               | 34                     | 3                     | 290   | 276 | 1                   | 3                  | 4.03☺                |
| <b>8d</b>               | 34                     | 3                     | 290   | 276 | 1                   | 3                  | 4.05☺                |
| <b>8e</b>               | 46                     | 3                     | 277   | 256 | 1                   | 4                  | 2.31☺                |
| <b>8f</b>               | 34                     | 3                     | 355   | 278 | 1                   | 3                  | 4.37☺                |
| <b>8g</b>               | 34                     | 3                     | 310   | 273 | 1                   | 3                  | 4.23☺                |
| <b>8h</b>               | 34                     | 3                     | 345   | 287 | 1                   | 3                  | 4.89☺                |
| <b>8i</b>               | 43                     | 5                     | 306   | 285 | 1                   | 4                  | 3.57☺                |
| <b>8j</b>               | 43                     | 4                     | 306   | 285 | 1                   | 4                  | 3.66☺                |
| <b>8k</b>               | 34                     | 4                     | 290   | 276 | 1                   | 3                  | 3.69☺                |
| <b>8l</b>               | 34                     | 6                     | 360   | 360 | 1                   | 3                  | 5.79                 |
| <b>8m</b>               | 34                     | 4                     | 340   | 320 | 1                   | 3                  | 4.86☺                |
| <b>8n</b>               | 43                     | 5                     | 356   | 329 | 1                   | 3                  | 4.76☺                |
| <b>8o</b>               | 34                     | 4                     | 304   | 293 | 1                   | 3                  | 4.10☺                |
| <b>8p</b>               | 73                     | 5                     | 388   | 347 | 1                   | 6                  | 4.00☺                |

a nViol, no. of violations; miLog P, molinspiration predicted Log P; MW, molecular weight; nON, no. of hydrogen bond acceptors; nOHNH, no. of hydrogen bond donors; and nrotb, no. of rotatable bond. ☺ Smiley symbols indicate the drug-like properties are acceptable

Ligplots of active and inactive compounds showing different interactions

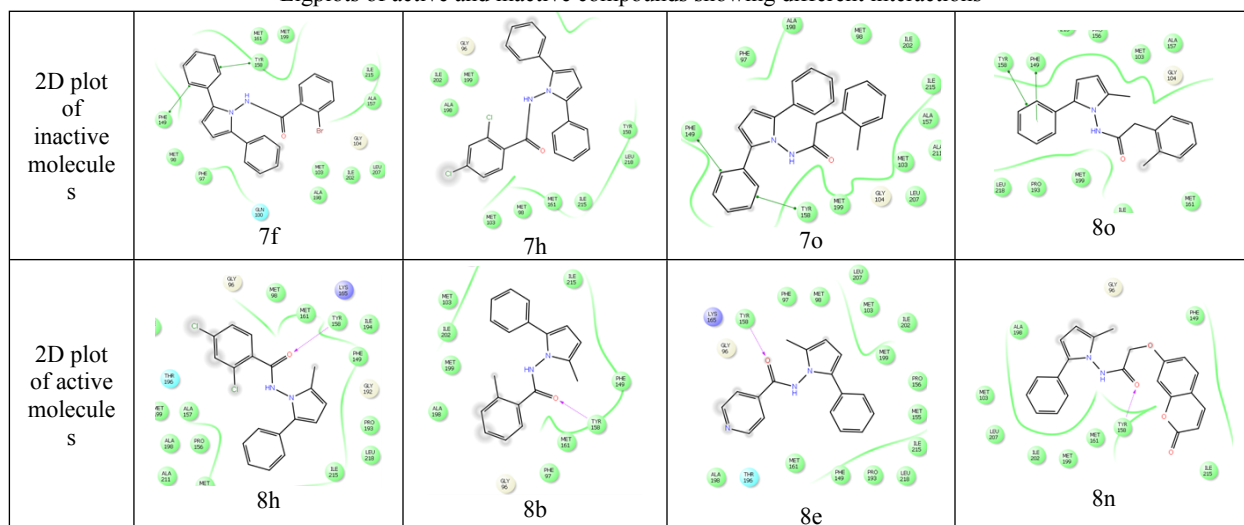

Compound 7c

<sup>1</sup>H NMR N-(2,5-diphenyl-1H-pyrrol-1-yl)-3-methylbenzamide

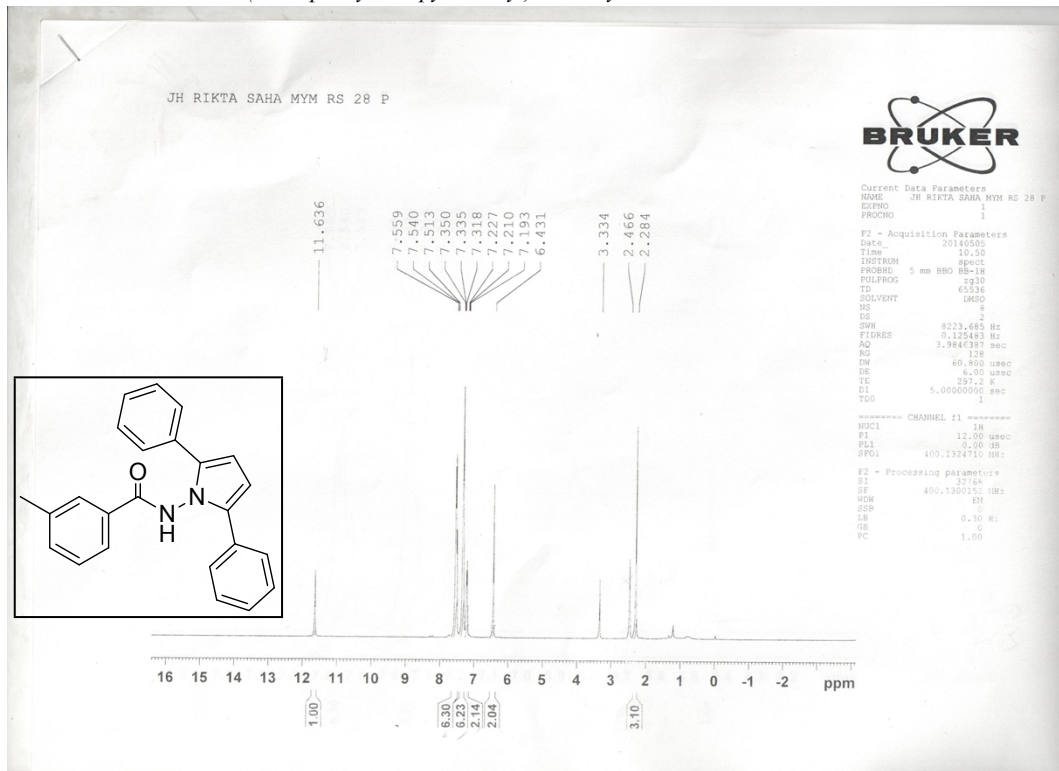

<sup>13</sup>C NMR N-(2,5-diphenyl-1H-pyrrol-1-yl)-3-methylbenzamide (7c)

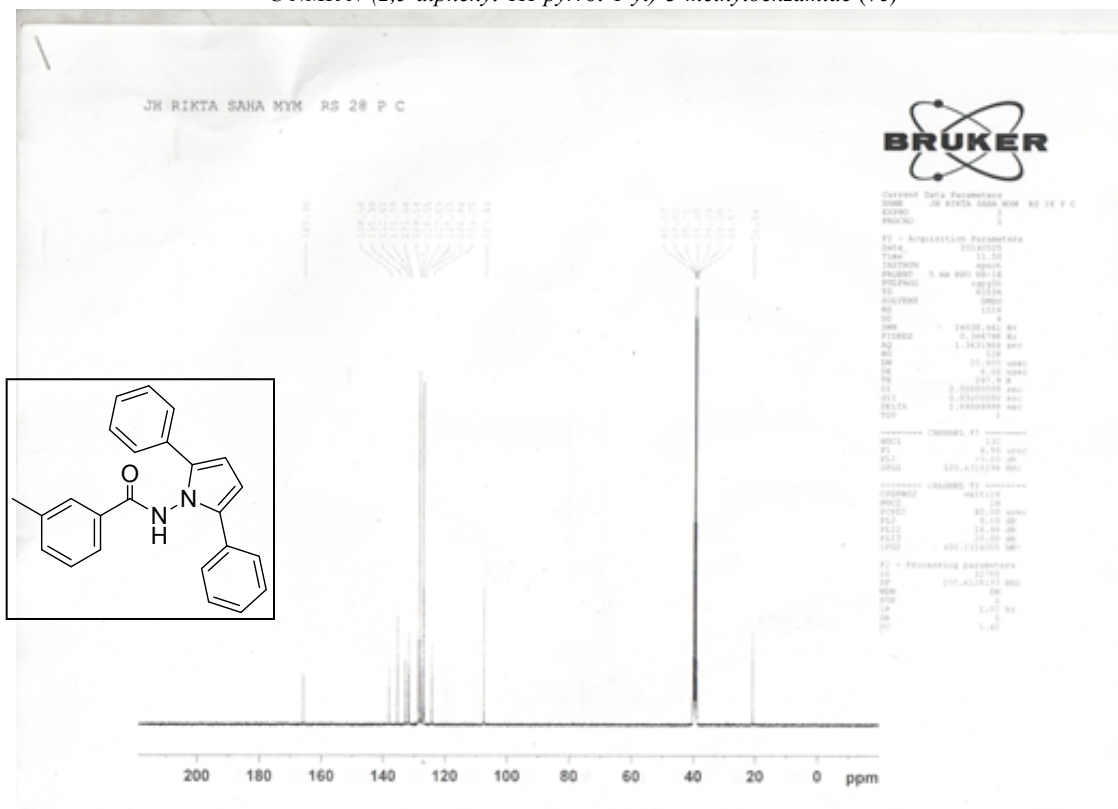

HPLC and Mass data of *N*-(2,5-diphenyl-1*H*-pyrrol-1-yl)-3-methylbenzamide (7c)

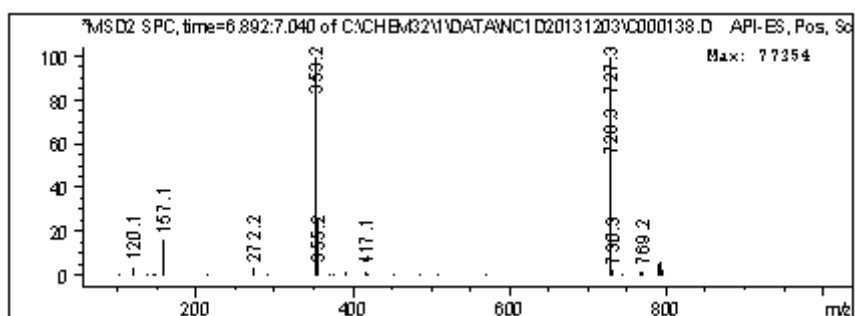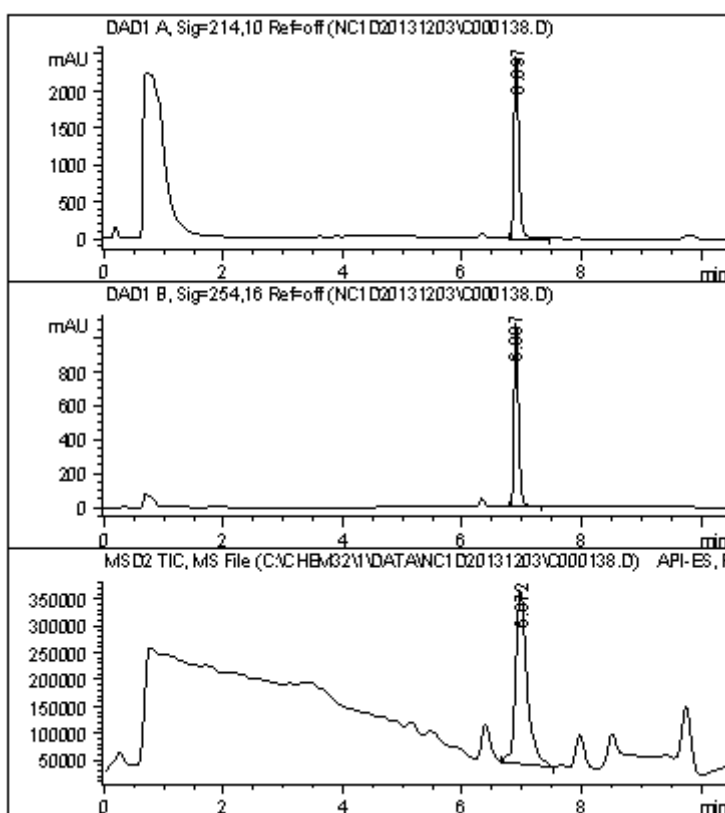

Compound 7e

<sup>1</sup>H NMR *N*-(2,5-diphenyl-1*H*-pyrrol-1-yl)isonicotinamide

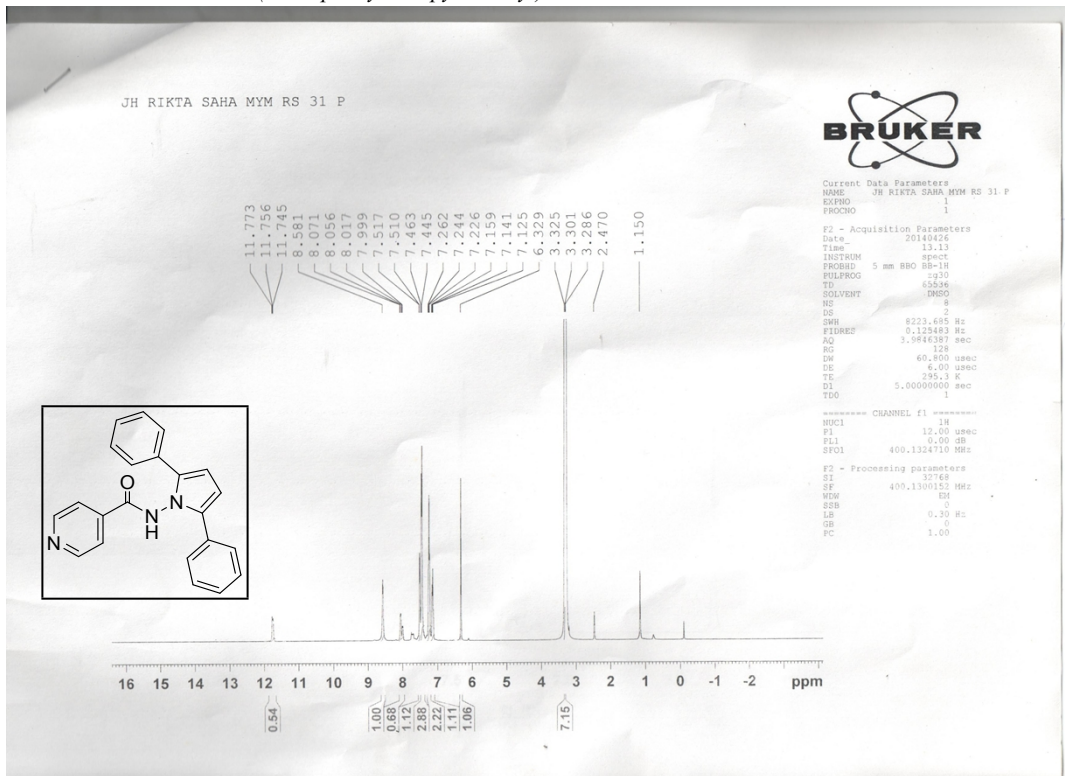

<sup>13</sup>C NMR *N*-(2,5-diphenyl-1*H*-pyrrol-1-yl)isonicotinamide (7e)

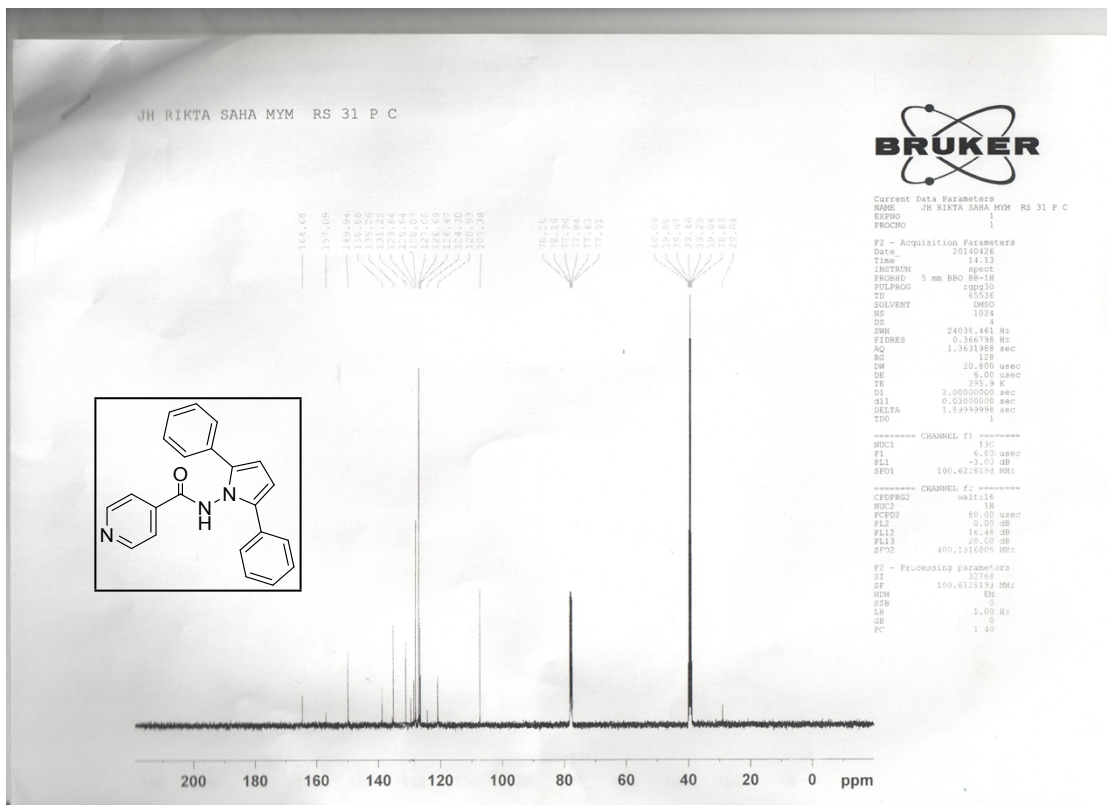

*HPLC and Mass data of N-(2,5-diphenyl-1H-pyrrol-1-yl)isonicotinamide (7e)*

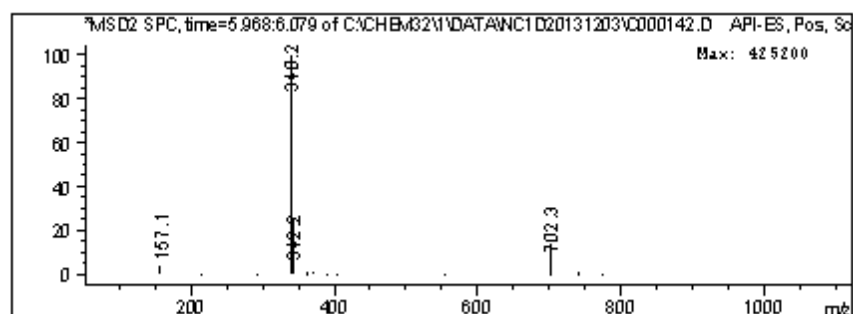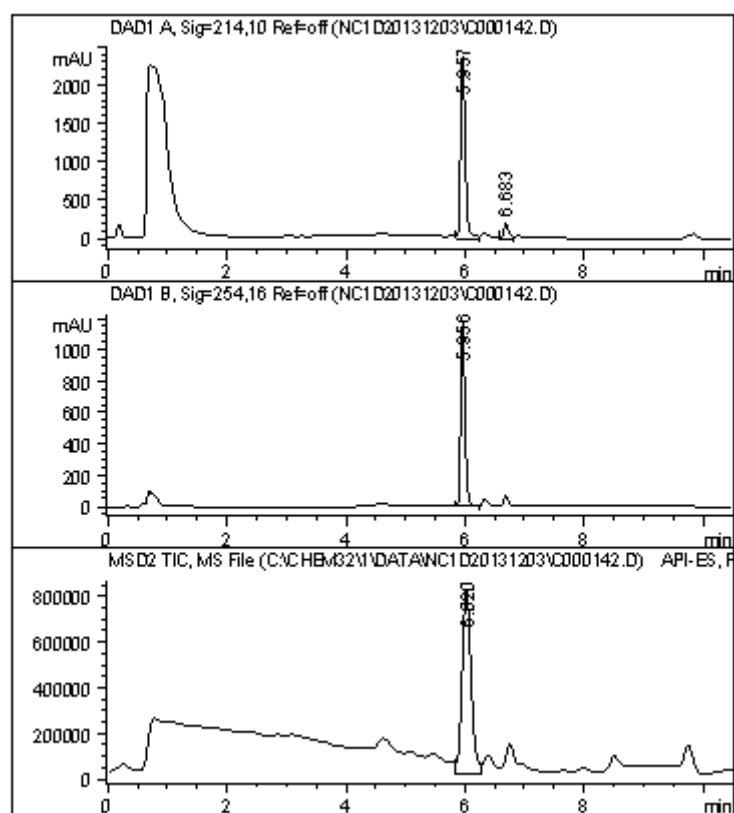



**Compound 7f** <sup>1</sup>H NMR 2-bromo-N-(2,5-diphenyl-1H-pyrrol-1-yl)benzamide

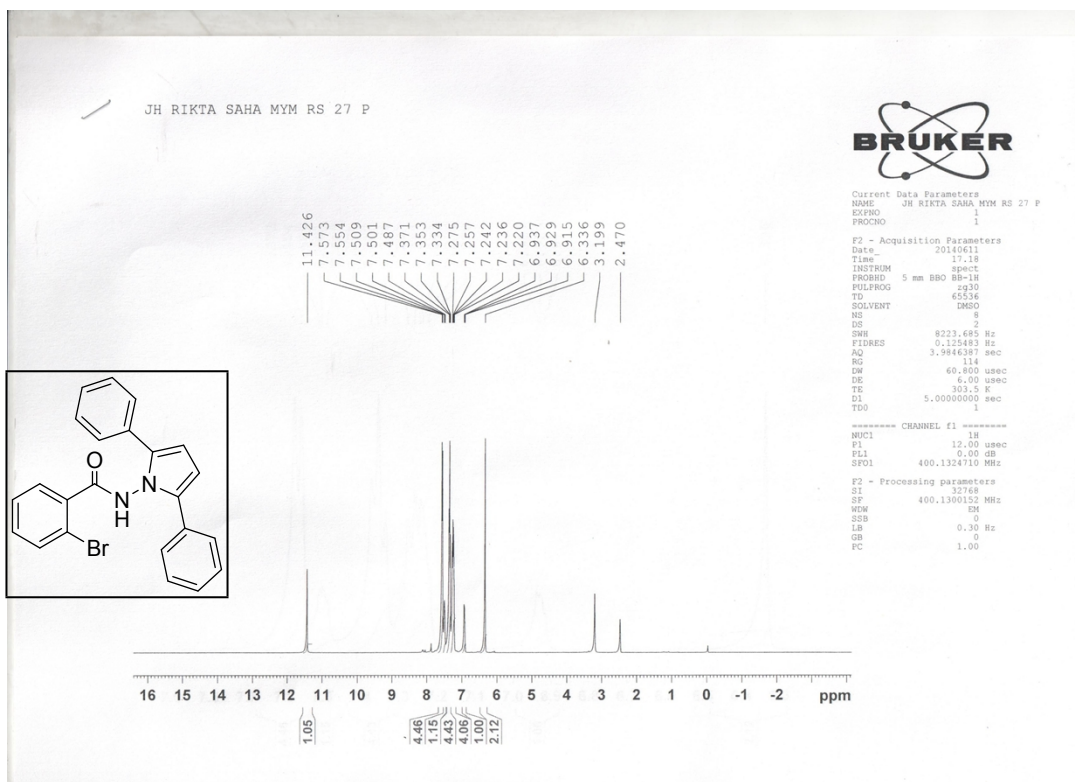

**Compound 7f** <sup>13</sup>C NMR 2-bromo-N-(2,5-diphenyl-1H-pyrrol-1-yl)benzamide

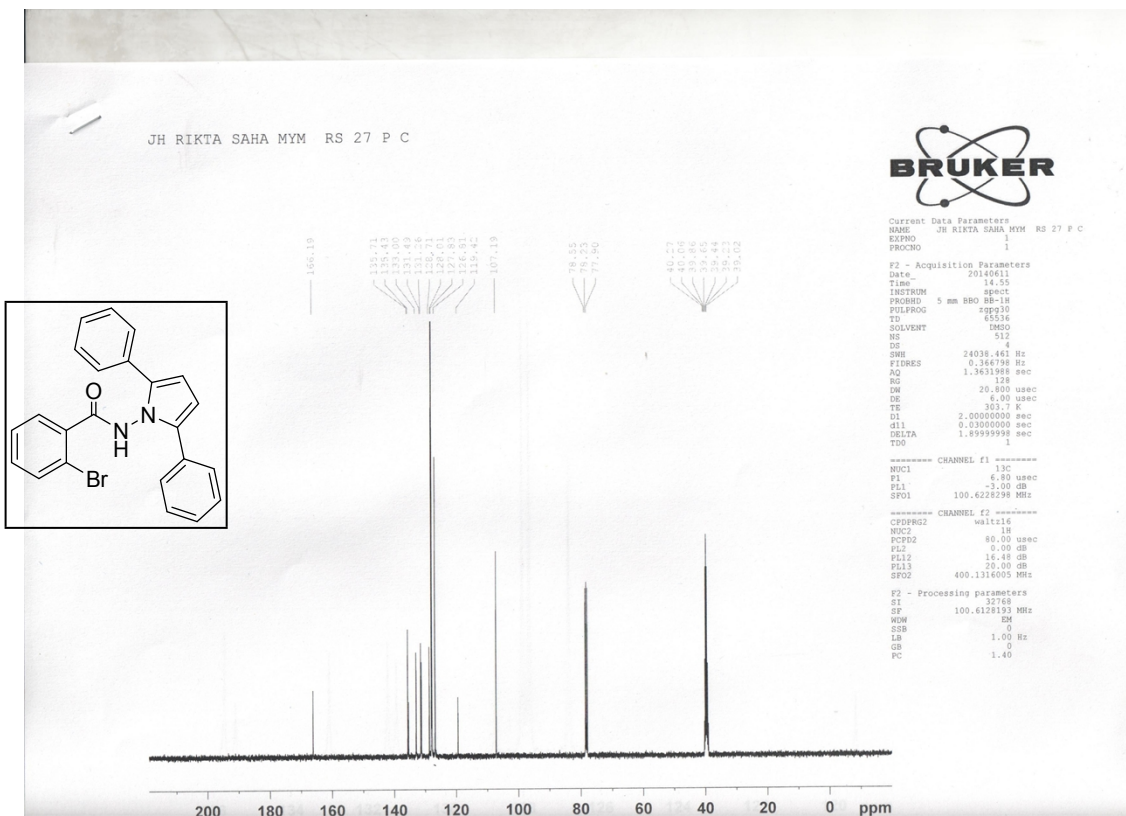

Mass data of 7f

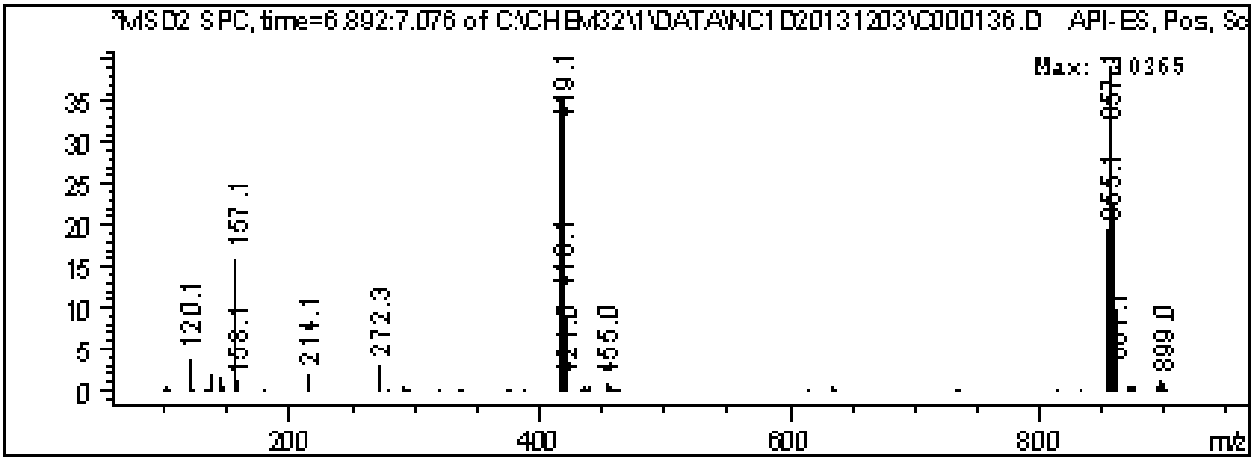

Compound 7g <sup>1</sup>H NMR 2-chloro-N-(2,5-diphenyl-1H-pyrrol-1-yl)benzamide

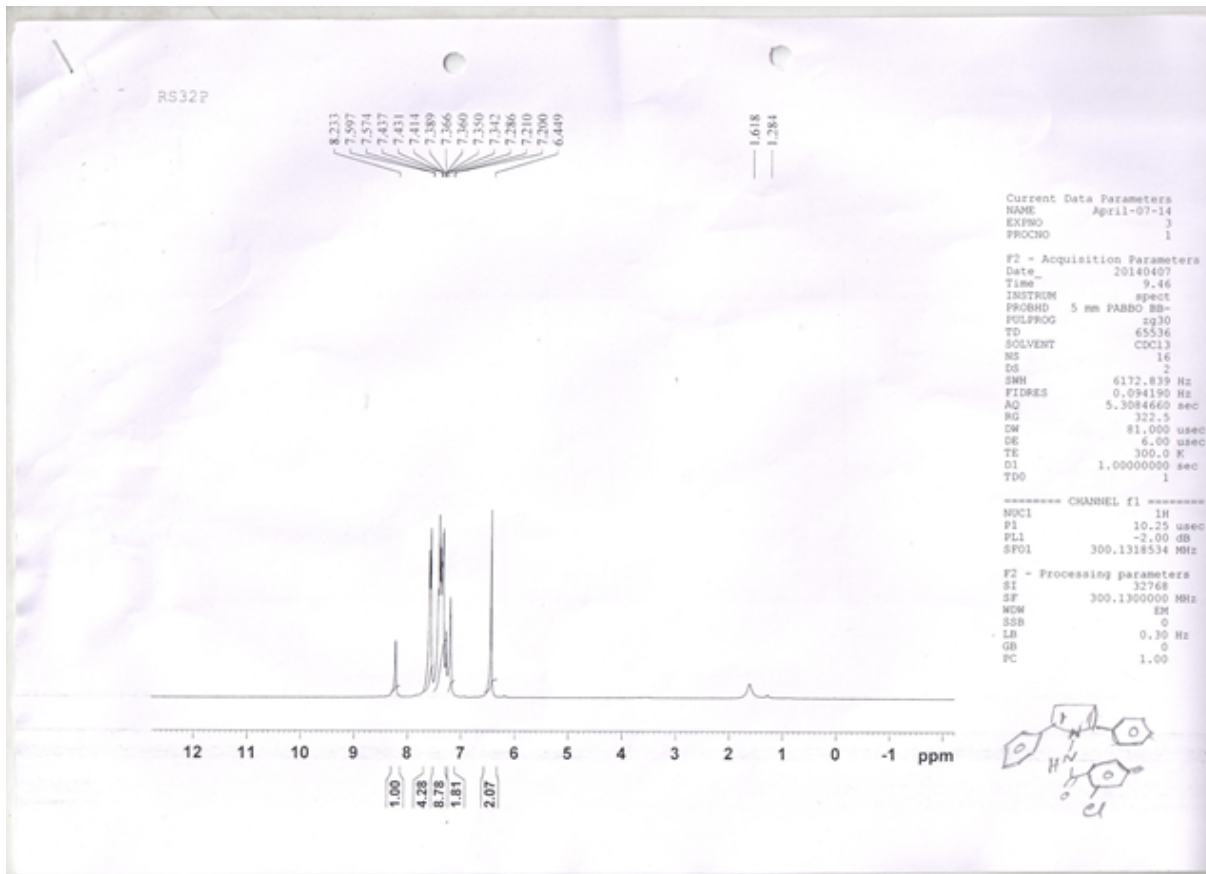

Compound 7g HPLC and Mass data of 2-chloro-N-(2,5-diphenyl-1H-pyrrol-1-yl)benzamide

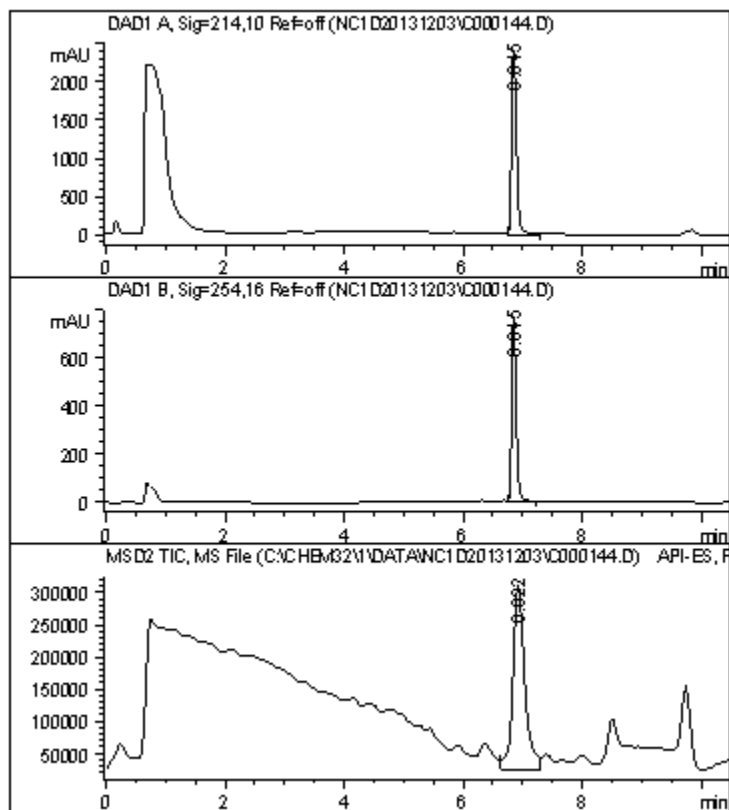

6.922 3978356 373.10 I

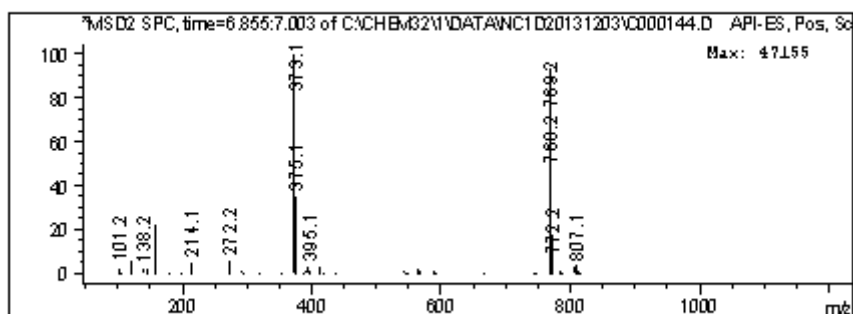

\*\*\* End of Report \*\*\*

**Compound 7j** Mass data of *N*-(2,5-diphenyl-1*H*-pyrrol-1-yl)-4-methoxybenzamide

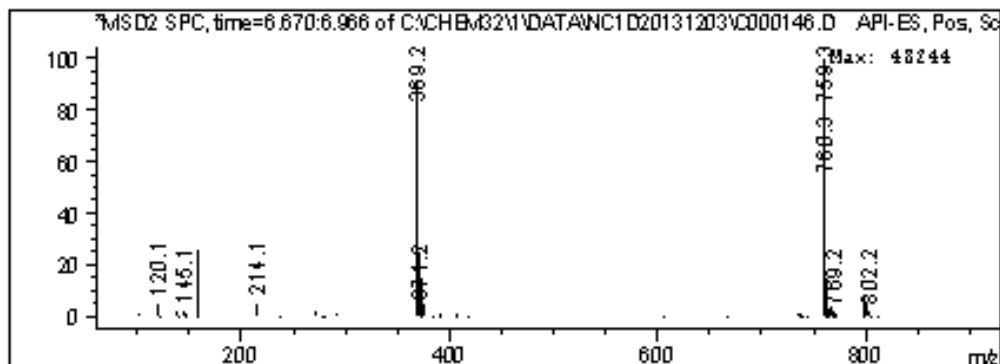

**Compound 7i** <sup>1</sup>H NMR *N*-(2,5-diphenyl-1*H*-pyrrol-1-yl)-2-(4-isobutylphenyl)propanamide

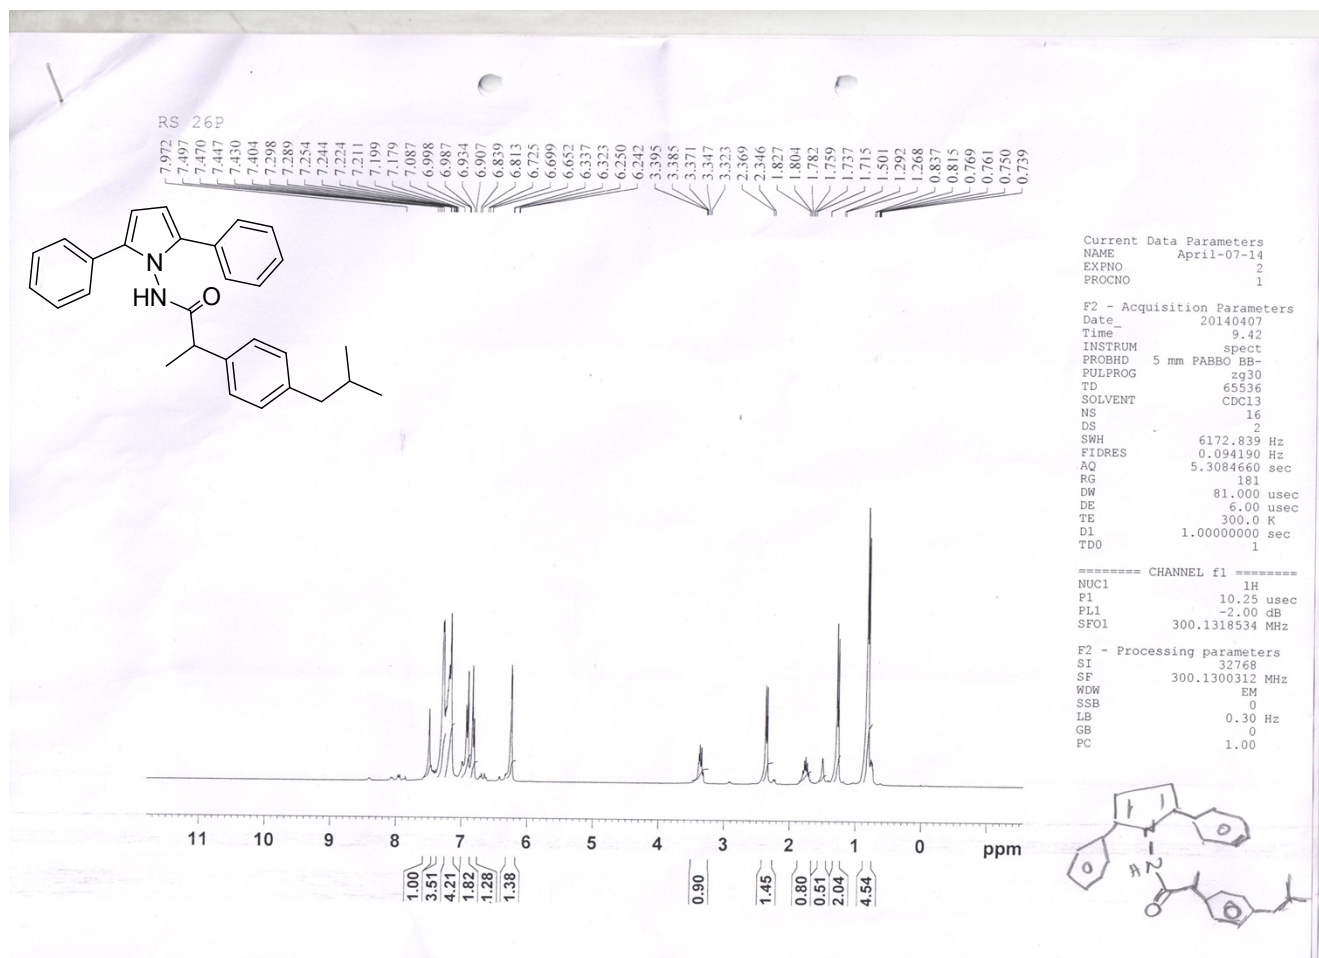

HPLC and Mass data of *N*-(2,5-diphenyl-1*H*-pyrrol-1-yl)-2-(4-isobutylphenyl)propanamide(7l)

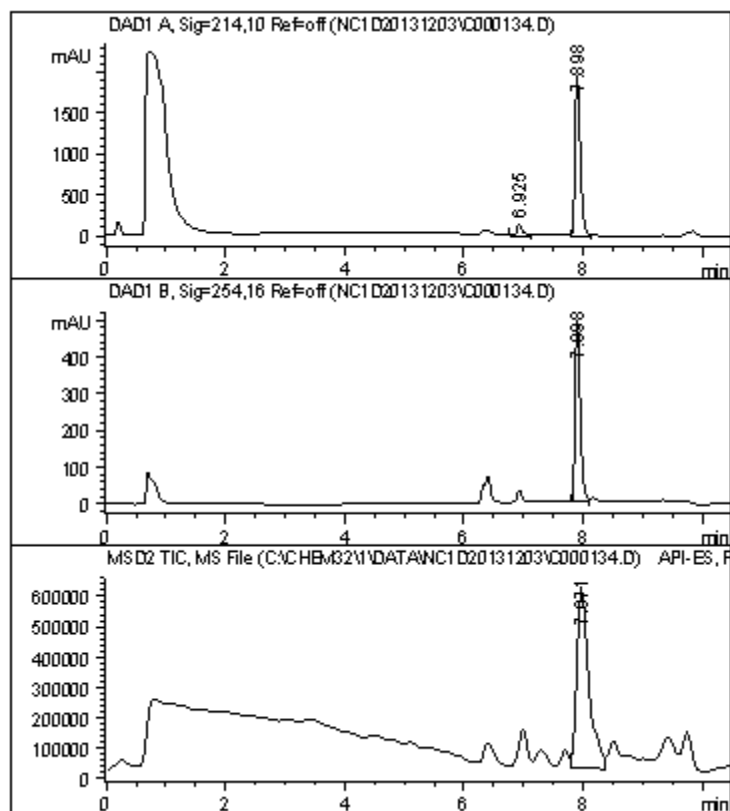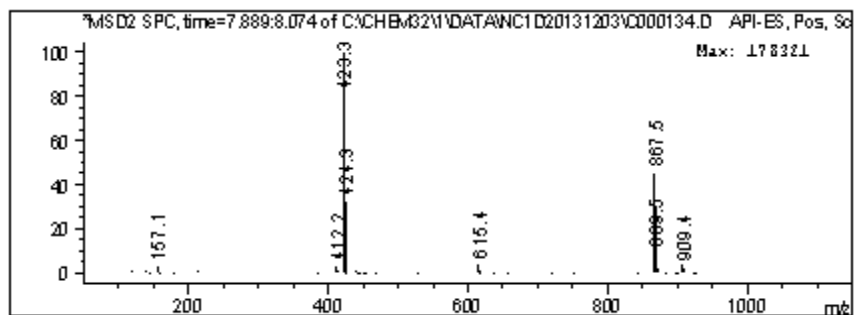

Compound 7n Mass data of *N*-(2,5-diphenyl-1*H*-pyrrol-1-yl)-2-(naphthalen-2-yloxy)acetamide

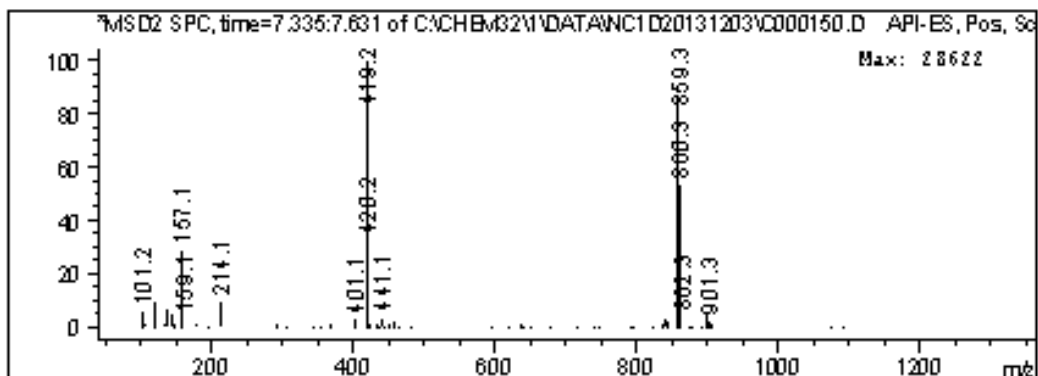

**Compound 7o** Mass data of *N*-(2,5-diphenyl-1*H*-pyrrol-1-yl)-2-(*o*-tolyl)acetamide

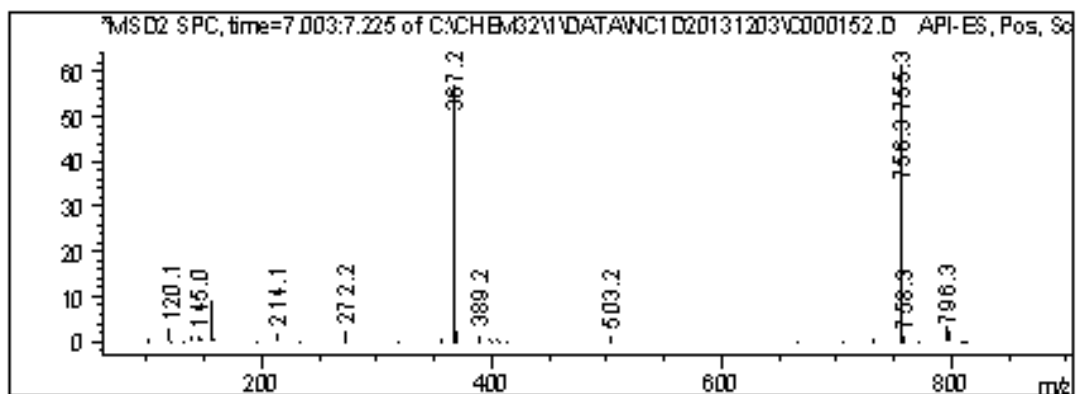

**Compound 7p** <sup>1</sup>HNMR data of *N*-(2,5-diphenyl-1*H*-pyrrol-1-yl)-2-((4-methyl-2-oxo-2*H*-chromen-7-yl)oxy)acetamide

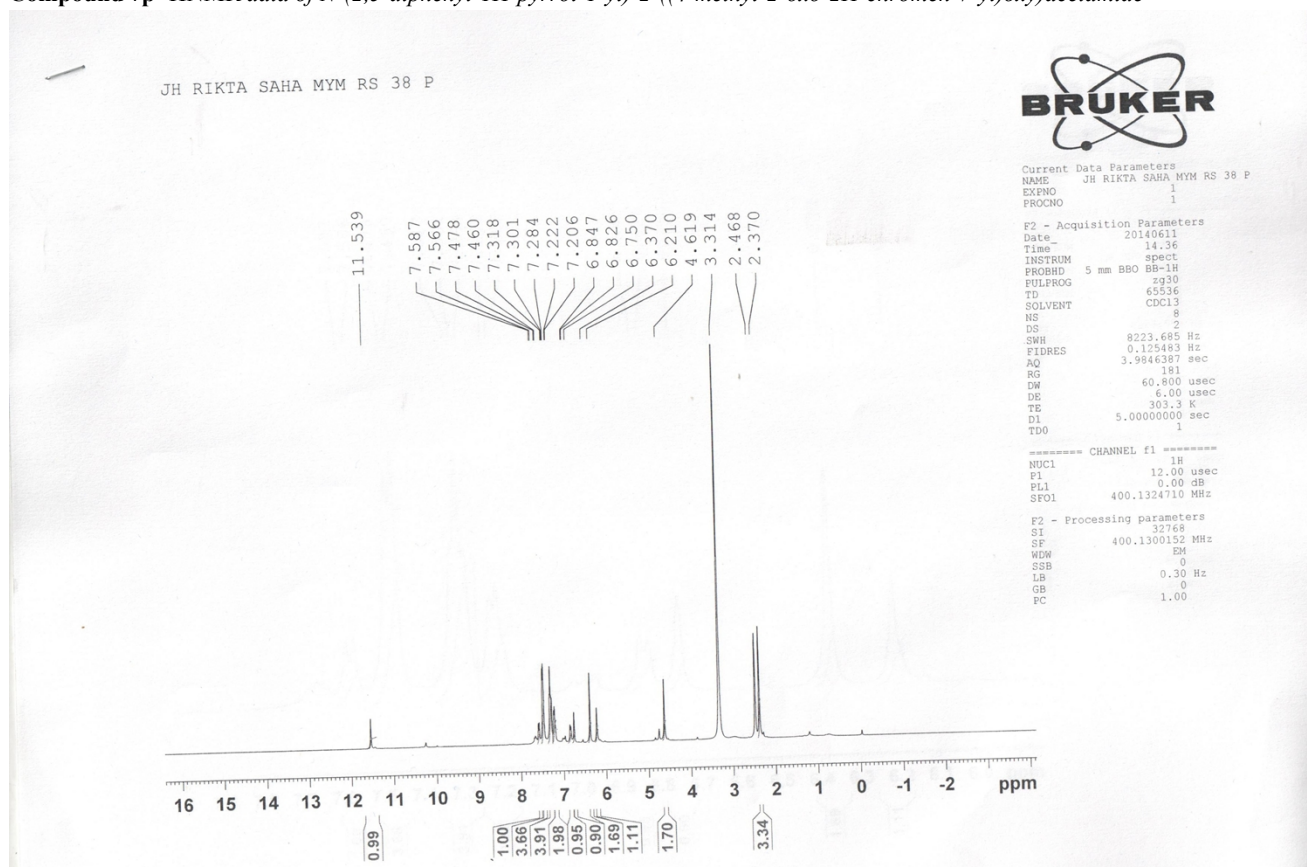

**Compound 7p** <sup>13</sup>CNMR data of *N*-(2,5-diphenyl-1*H*-pyrrol-1-yl)-2-((4-methyl-2-oxo-2*H*-chromen-7-yl)oxy)acetamide

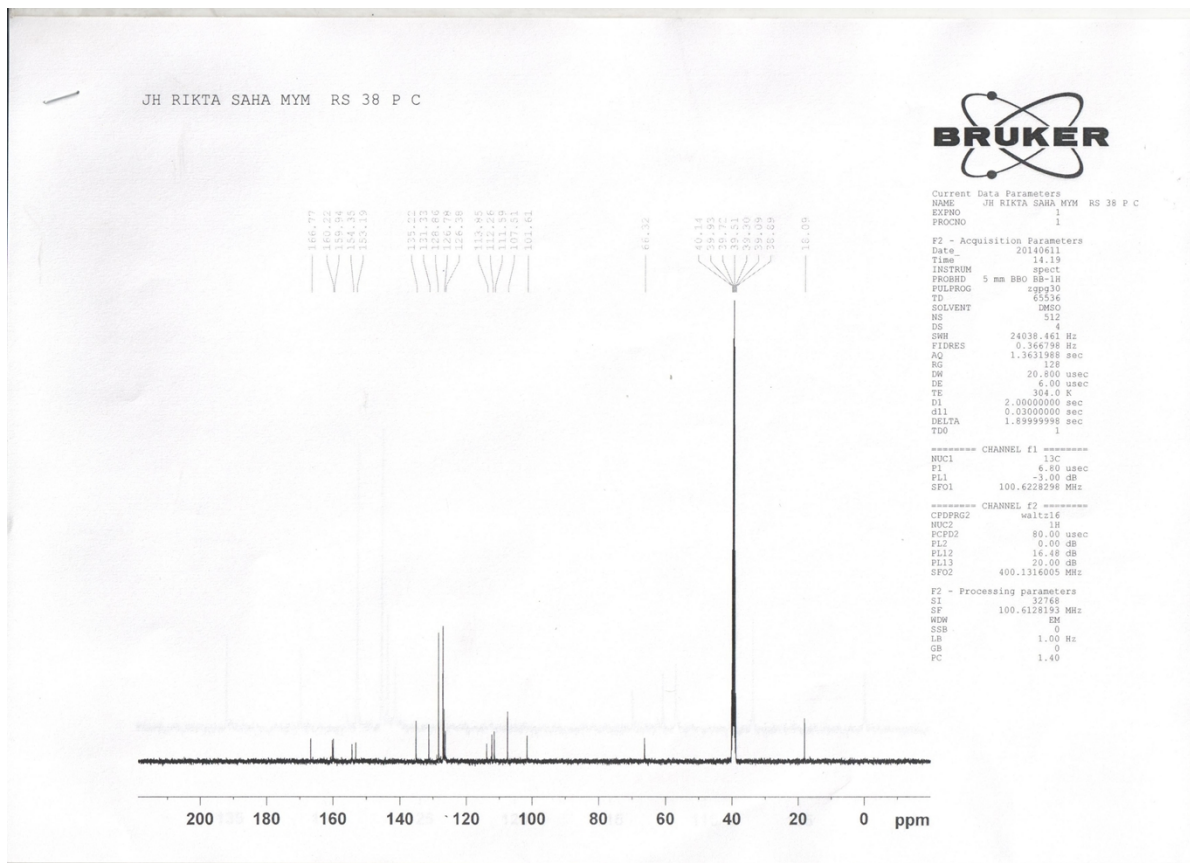

**Compound 7p** Mass data of *N*-(2,5-diphenyl-1*H*-pyrrol-1-yl)-2-((4-methyl-2-oxo-2*H*-chromen-7-yl)oxy)acetamide

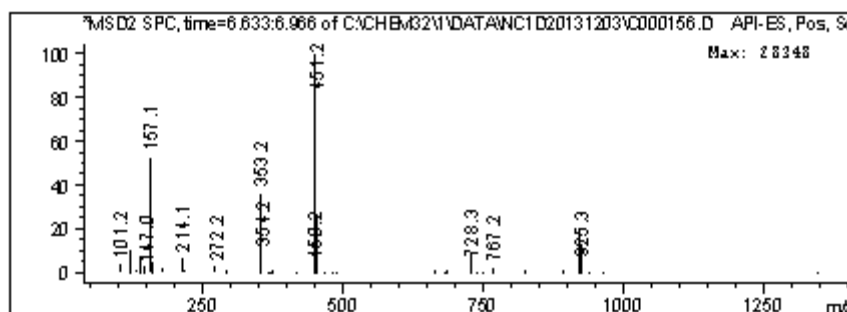

Compound 8a

<sup>1</sup>HNMR data of *N*-(2-Methyl-5-phenyl-1*H*-pyrrol-1-yl)benzamide

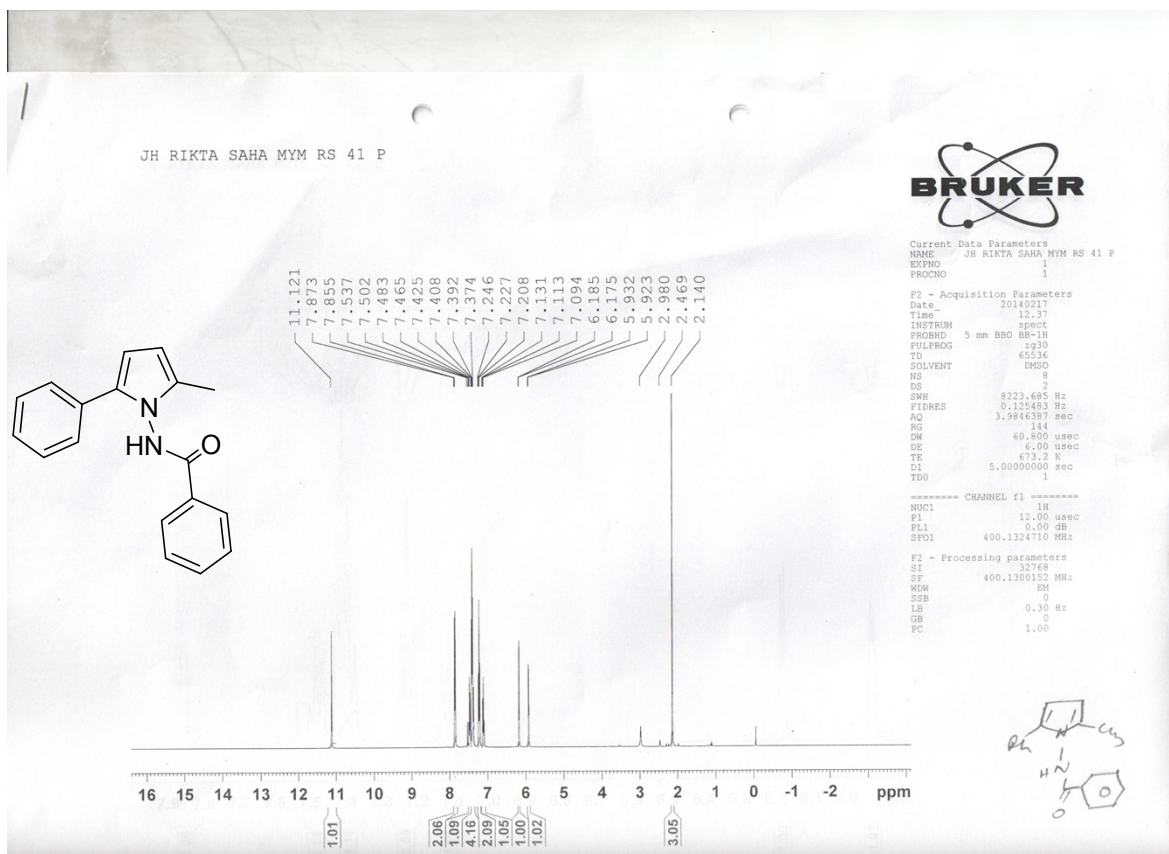

Compound 8a

<sup>13</sup>CNMR data of *N*-(2-Methyl-5-phenyl-1*H*-pyrrol-1-yl)benzamide

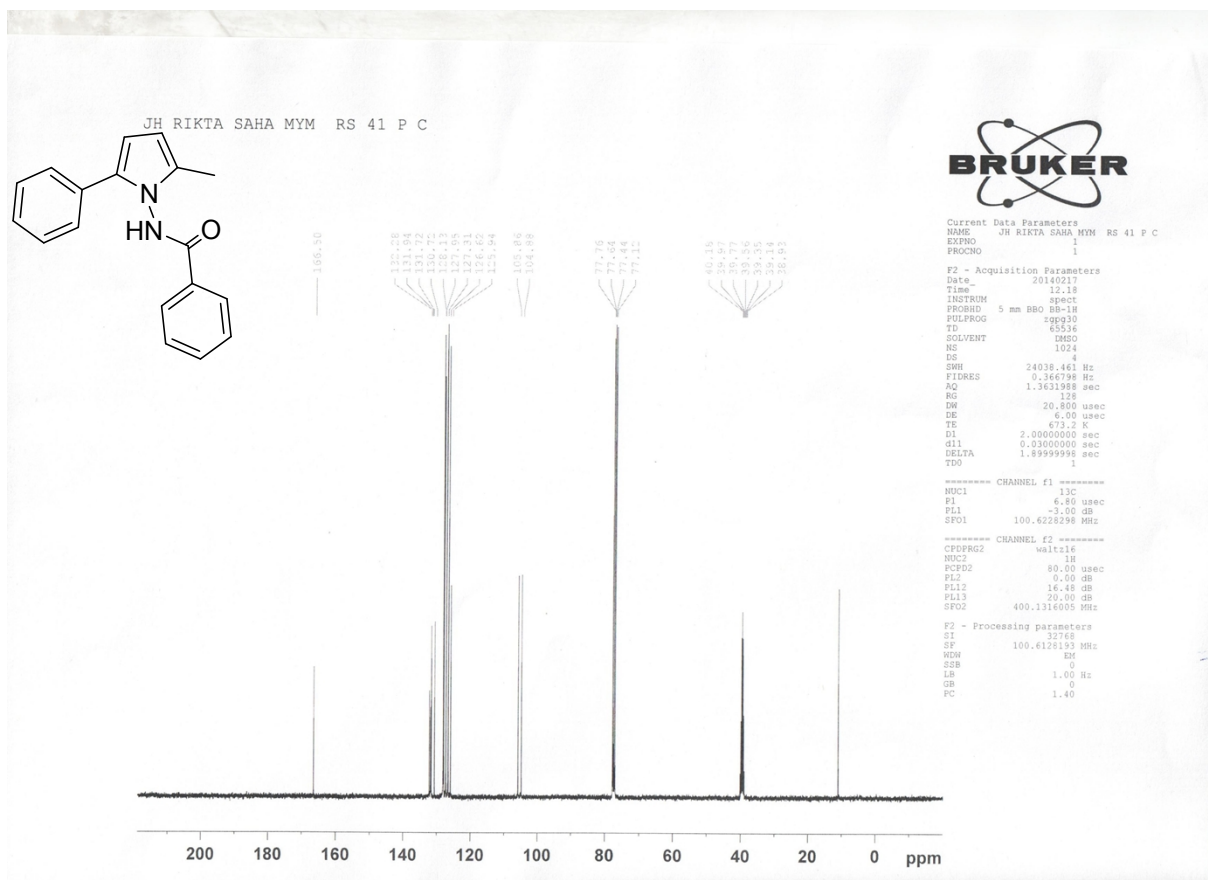



Data File C:\CHEM32\1\DATA\NCID20140304\C000044.D

Sample Name: NCI-0000678

```
=====
Acq. Operator   : James A                      Seq. Line : 44
Acq. Instrument : Instrument 1                 Location  : Vial 22
Injection Date  : 3/4/2014 11:41:10 PM        Inj       : 1
                                                Inj Volume: Inj prog

Acq. Method     : C:\CHEM32\1\METHODS\0 NIH ES ONLY YO.M
Last changed    : 10/28/2013 4:11:24 PM by Mai Ann Bailey Thayer
Analysis Method : C:\CHEM32\1\METHODS\0 NIH ES ONLY YO.M
Last changed    : 3/5/2014 8:50:12 AM by Susantha
                 (modified after loading)
Method Info     : Electrospray ionization, Positive
=====
```

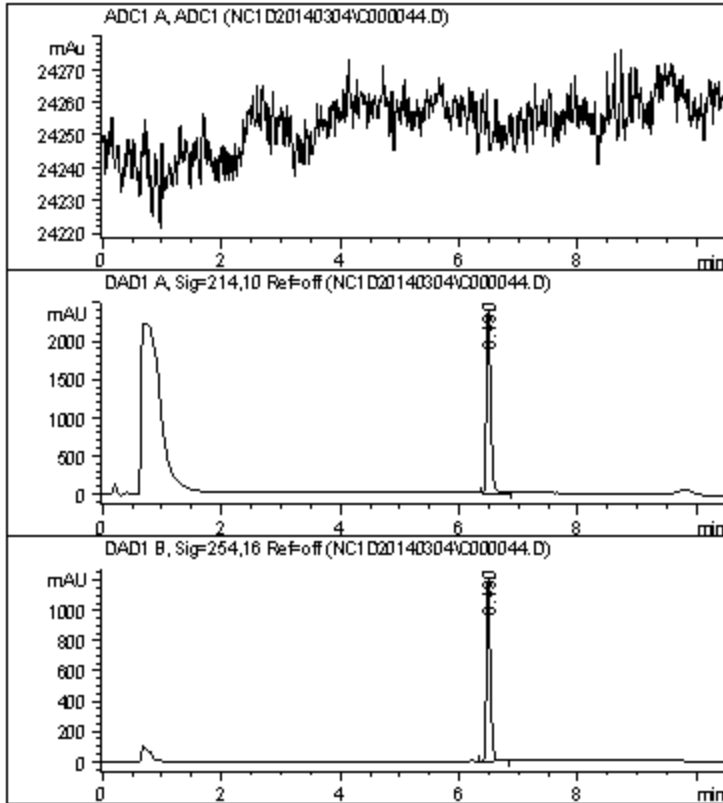

Compound 8d 4-Methyl-N-(2-methyl-5-phenyl-1H-pyrrol-1-yl)benzamide

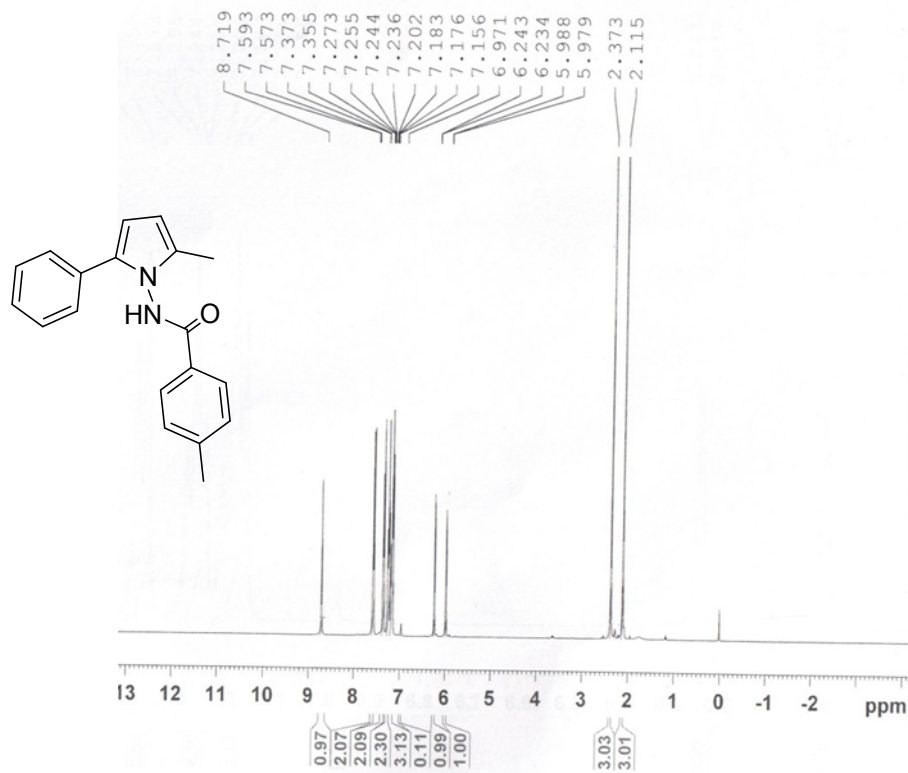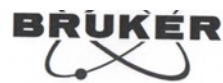

Current Data Parameters  
NAME JH RIKTA SARA MYM RS  
EXPNO 1  
PROCNO 1

F2 - Acquisition Parameters  
Date\_ 20140212  
Time 14.27  
INSTRUM spect  
PROBHD 5 mm BBO BB-1H  
PULPROG zg30  
TD 65536  
SOLVENT CDC13  
NS 8  
DS 2  
SWH 8223.685 Hz  
FIDRES 0.125483 Hz  
AQ 3.9846387 sec  
RG 128  
DW 60.800 usec  
DE 6.00 usec  
TE 294.7 K  
D1 5.00000000 sec  
TDO 1

\*\*\*\*\* CHANNEL f1 \*\*\*\*\*  
NUC1 1H  
P1 12.00 usec  
PL1 0.00 dB  
SFO1 400.1324710 MHz

F2 - Processing parameters  
SI 32768  
SF 400.1300152 MHz  
WDW EM  
SSB 0  
LB 0.30 Hz  
GB 0  
FC 1.00

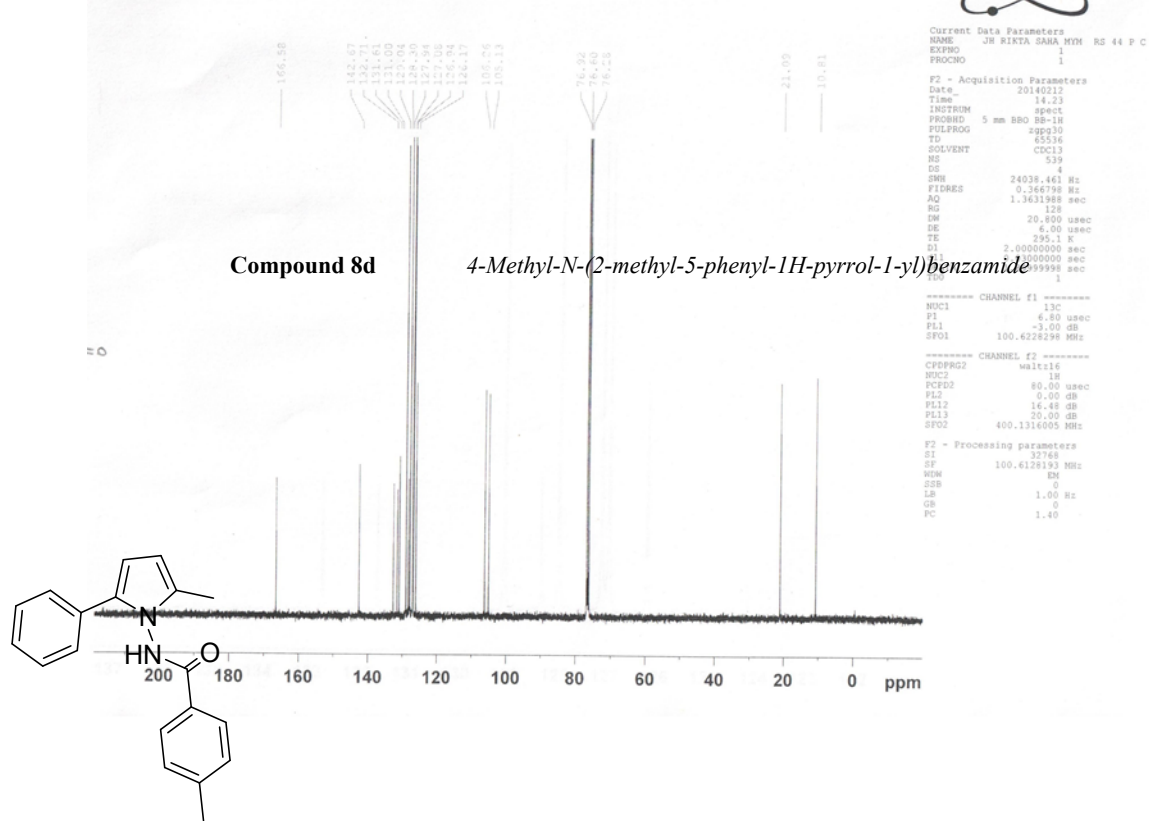

### HPLC data

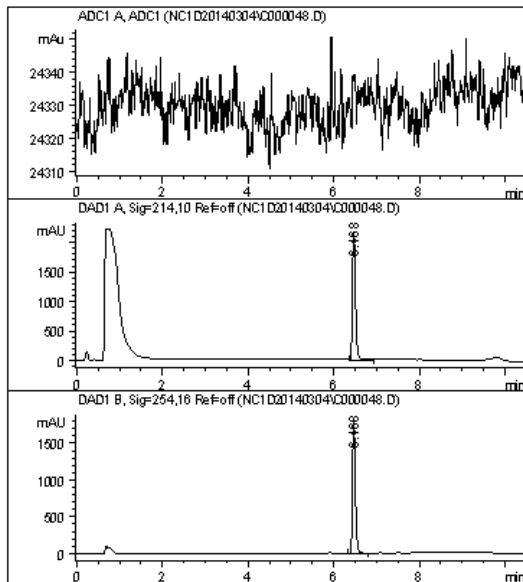

**Compound 8c** <sup>1</sup>HNMR of *N*-(2-Methyl-5-phenyl-1H-pyrrol-1-yl)isonicotinamide

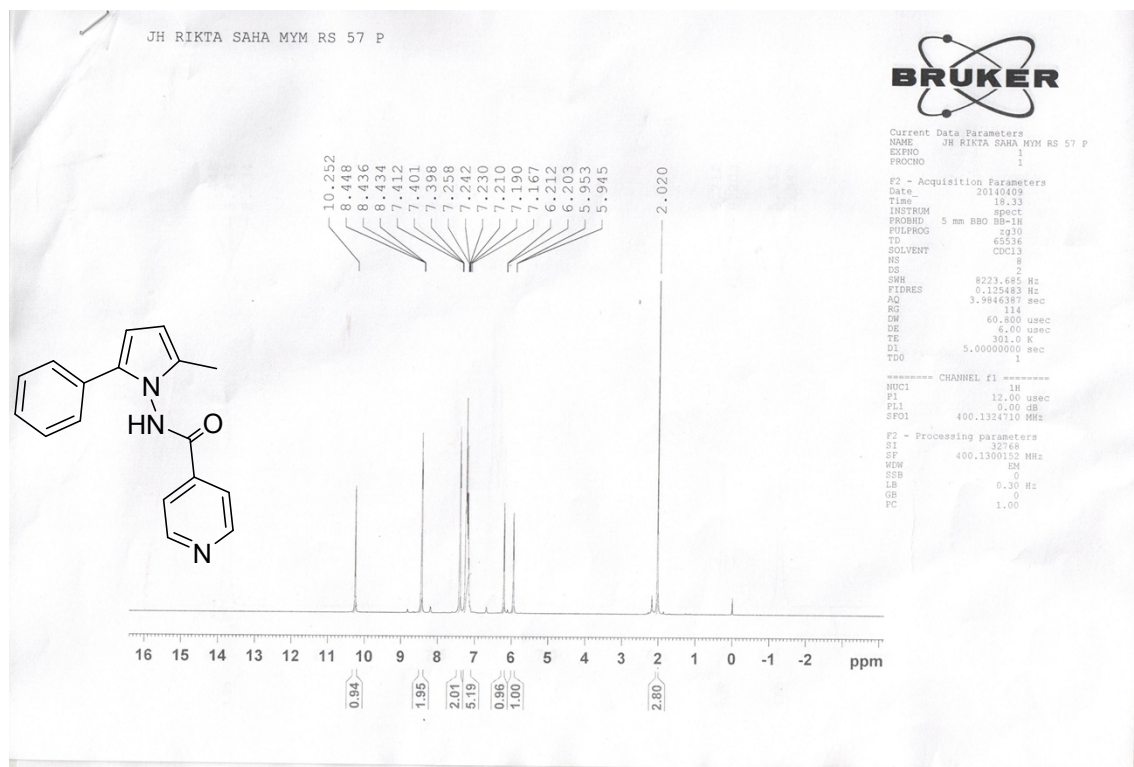

**Compound 8c** <sup>13</sup>CNMR of *N*-(2-Methyl-5-phenyl-1H-pyrrol-1-yl)isonicotinamide

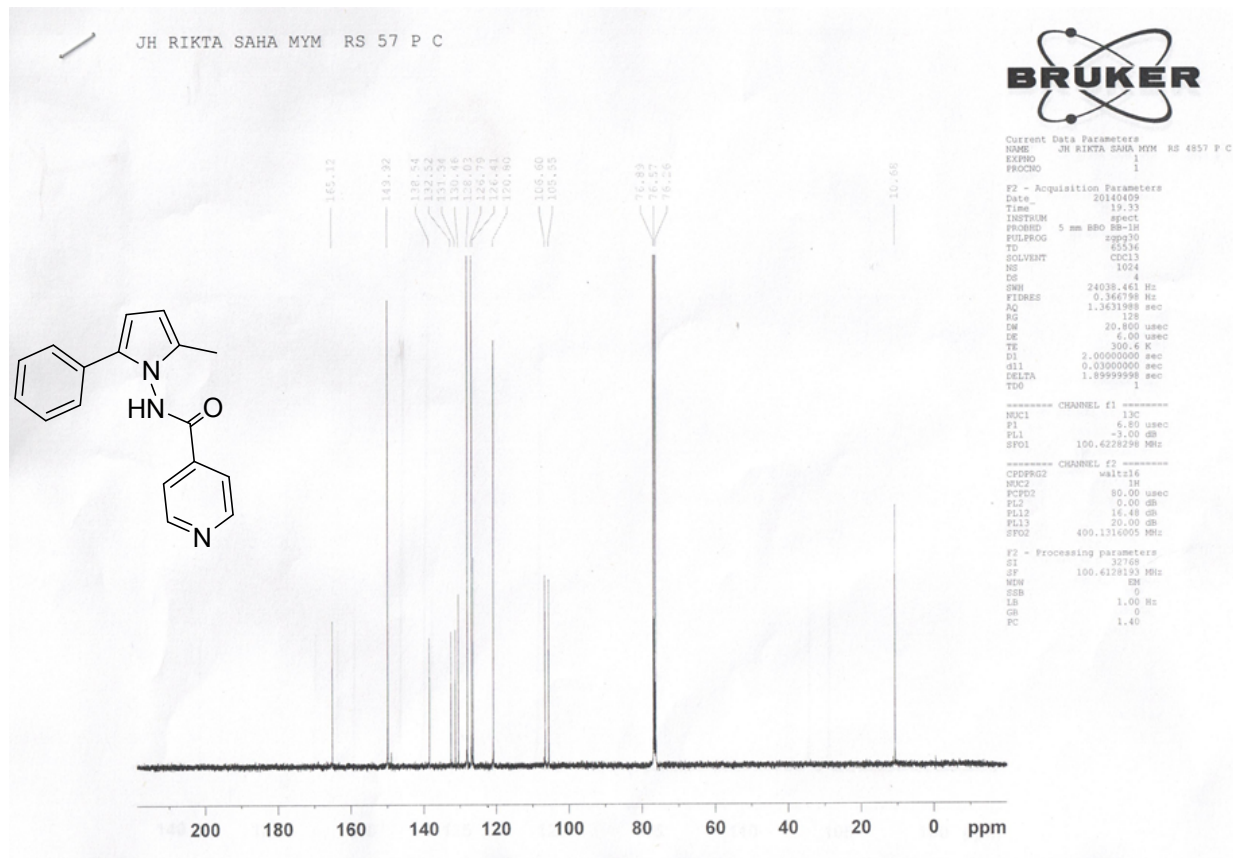

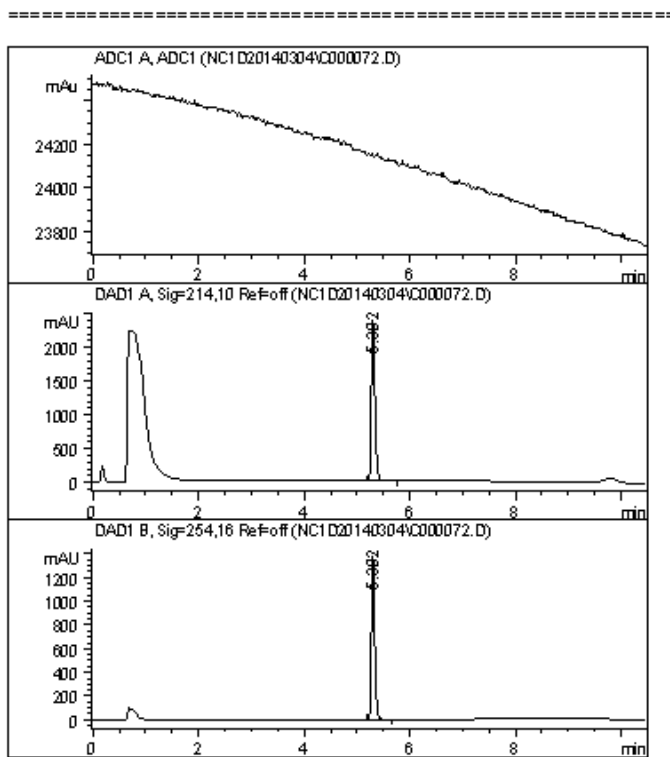

**Compound 8f** 2-Bromo-N-(2-methyl-5-phenyl-1H-pyrrol-1-yl)benzamide

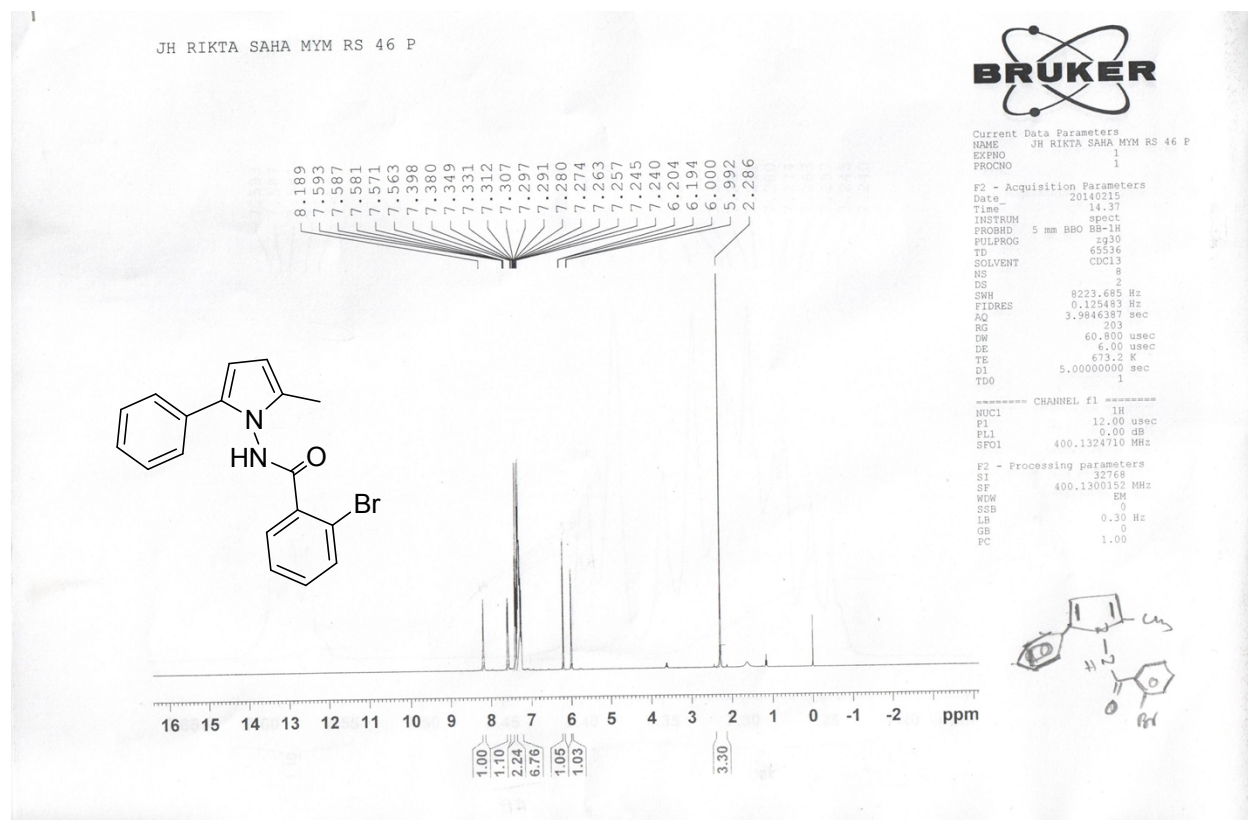

**Compound 8f** 2-Bromo-N-(2-methyl-5-phenyl-1H-pyrrol-1-yl)benzamide

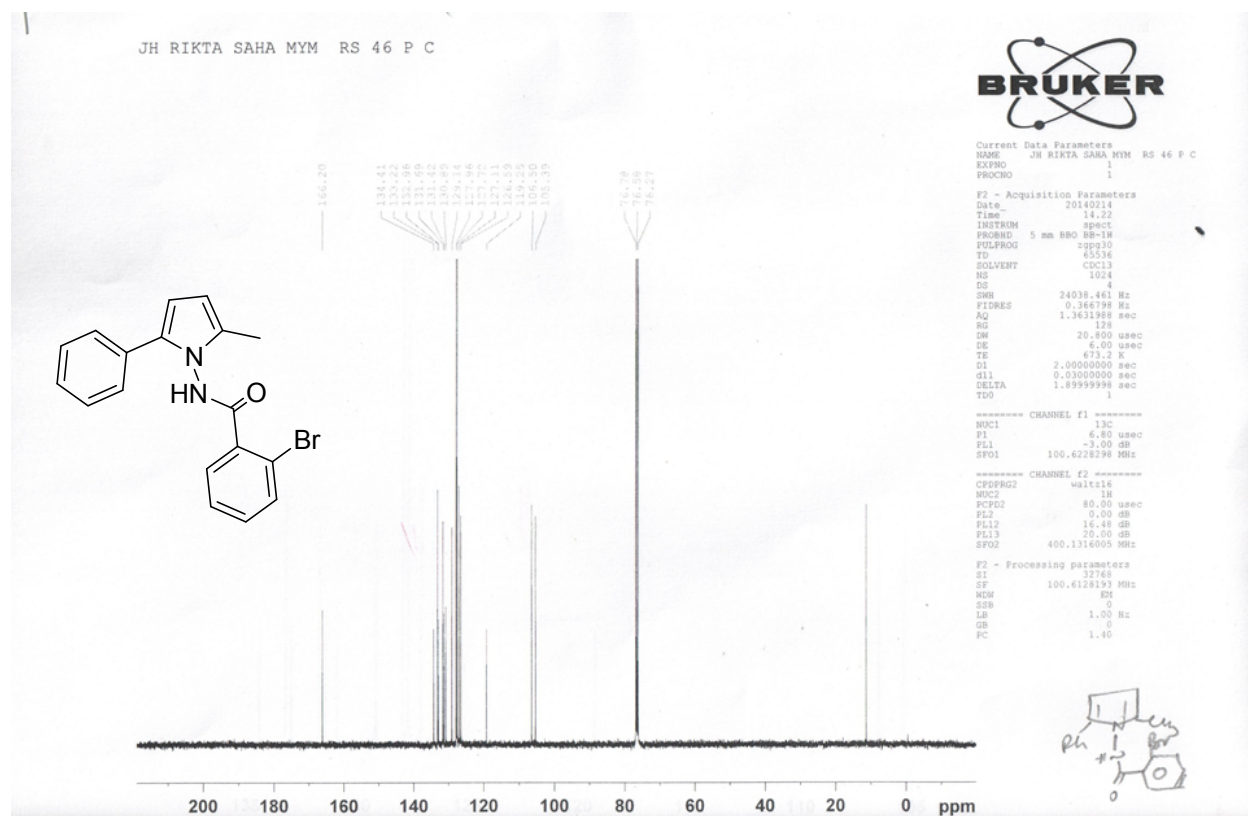

**Compound 8h**

*2,4-Dichloro-N-(2-methyl-5-phenyl-1H-pyrrol-1-yl)benzamide*

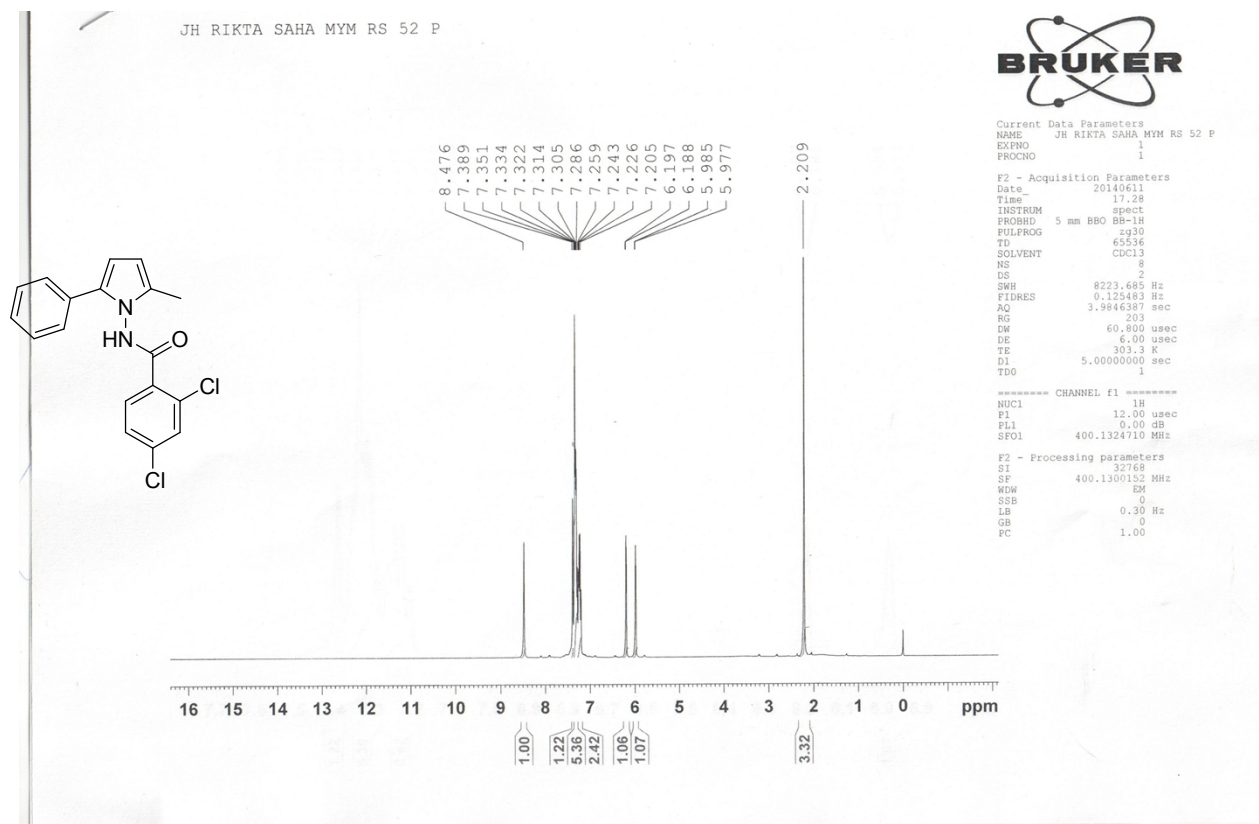

**Compound 8h**

*2,4-Dichloro-N-(2-methyl-5-phenyl-1H-pyrrol-1-yl)benzamide*

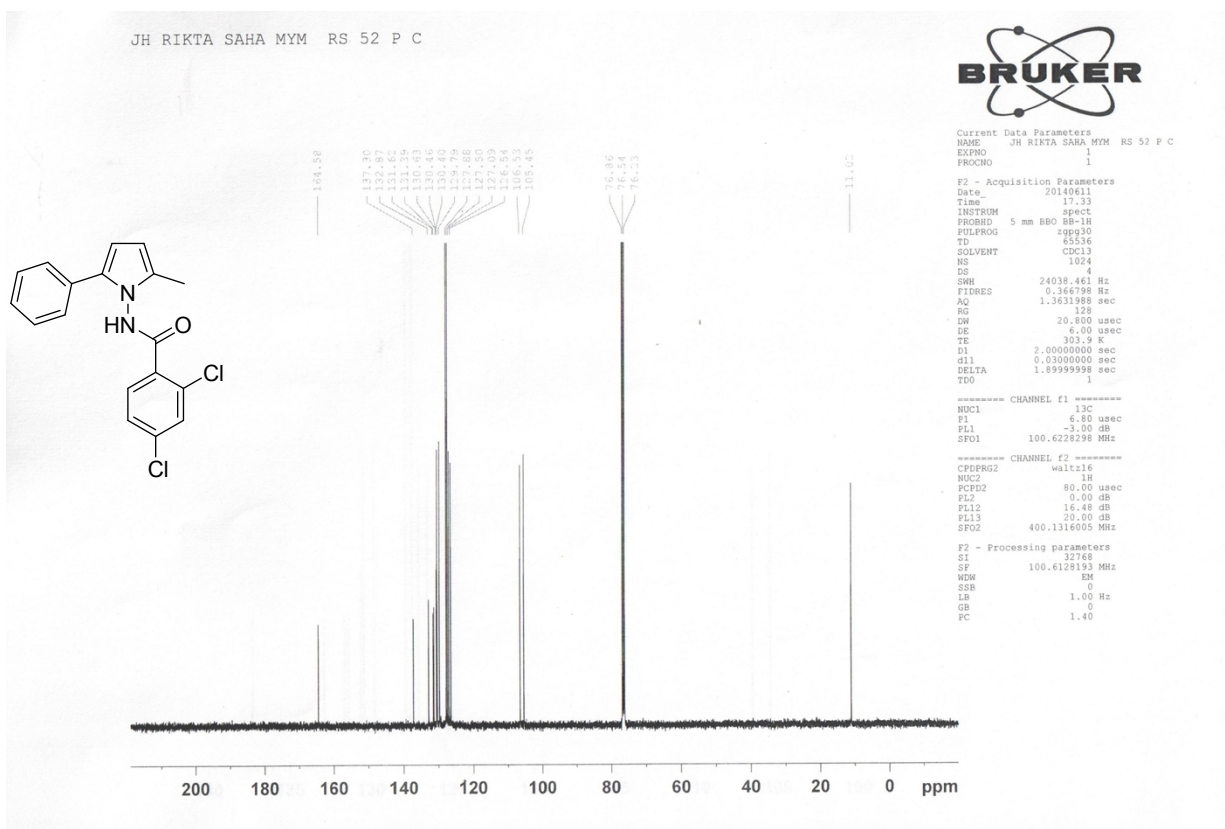

**Compound 8i** *N*-(2-Methyl-5-phenyl-1H-pyrrol-1-yl)-2-phenoxyacetamide

JH RIKTA SAHA MYM RS 43 P

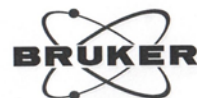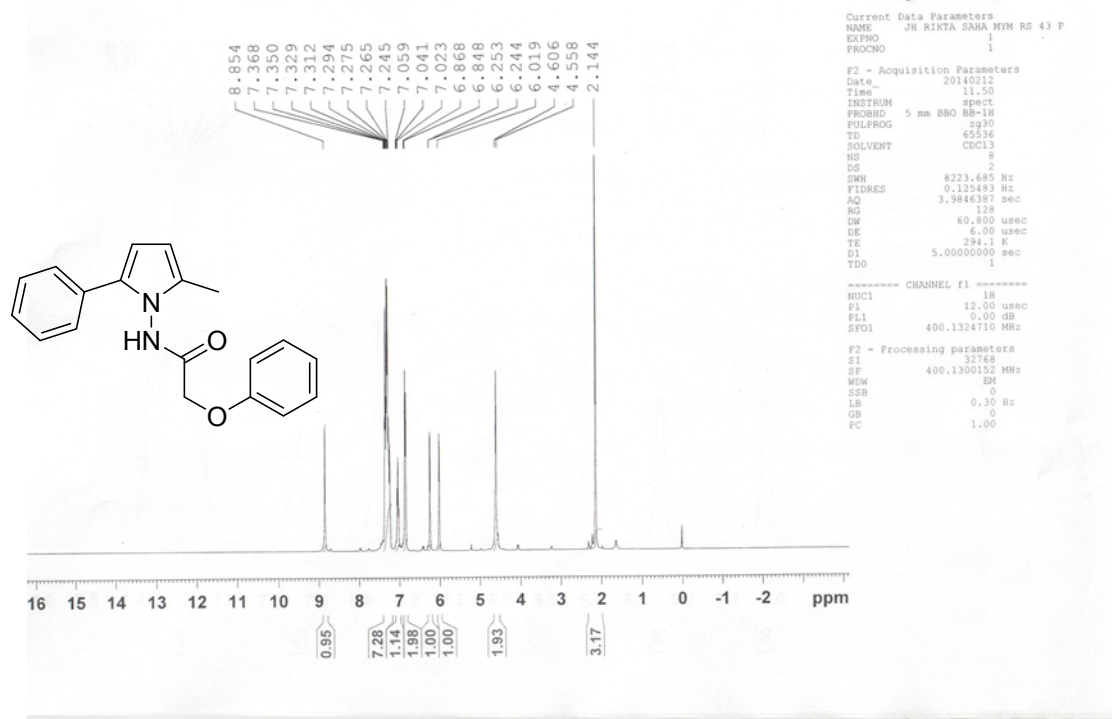

**Compound 8i** <sup>13</sup>C NMR *N*-(2-Methyl-5-phenyl-1H-pyrrol-1-yl)-2-phenoxyacetamide

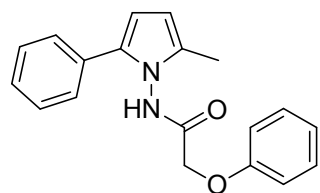



**Compound 8j** <sup>1</sup>HNMR 4-Methoxy-N-(2-methyl-5-phenyl-1H-pyrrol-1-yl)benzamide

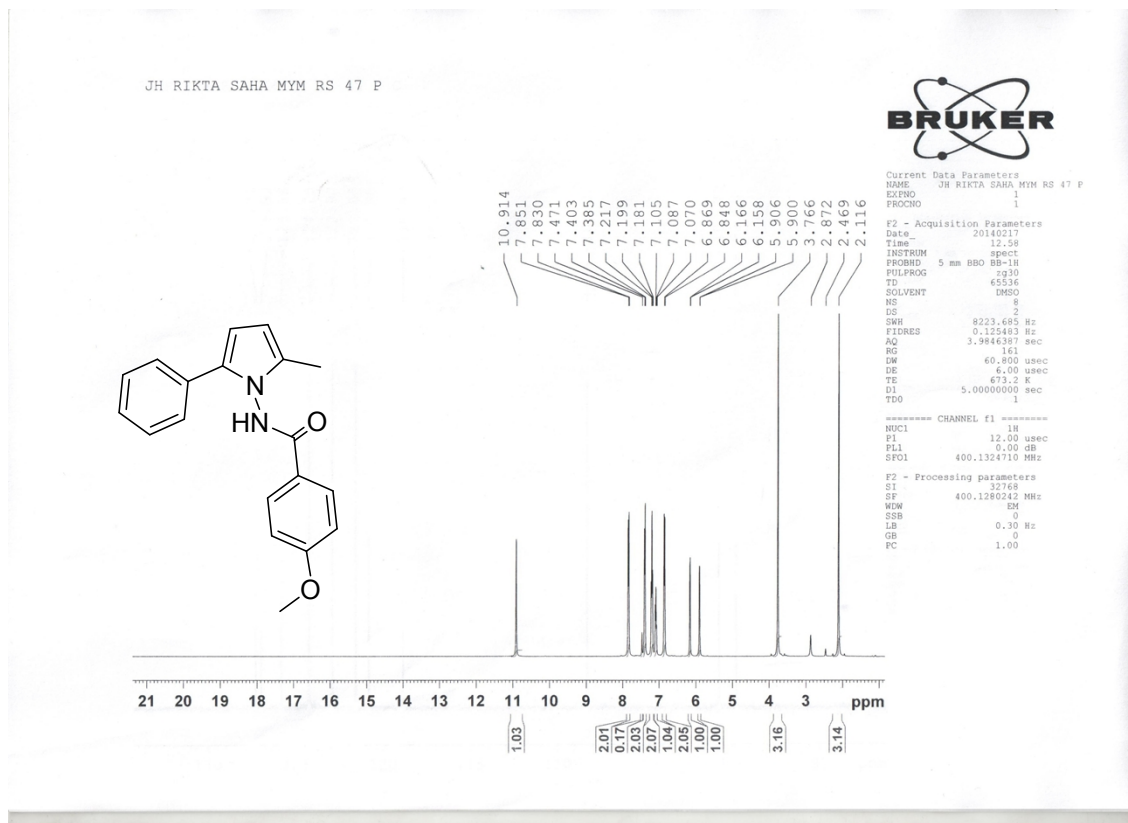

**Compound 8j** <sup>13</sup>CNMR 4-Methoxy-N-(2-methyl-5-phenyl-1H-pyrrol-1-yl)benzamide

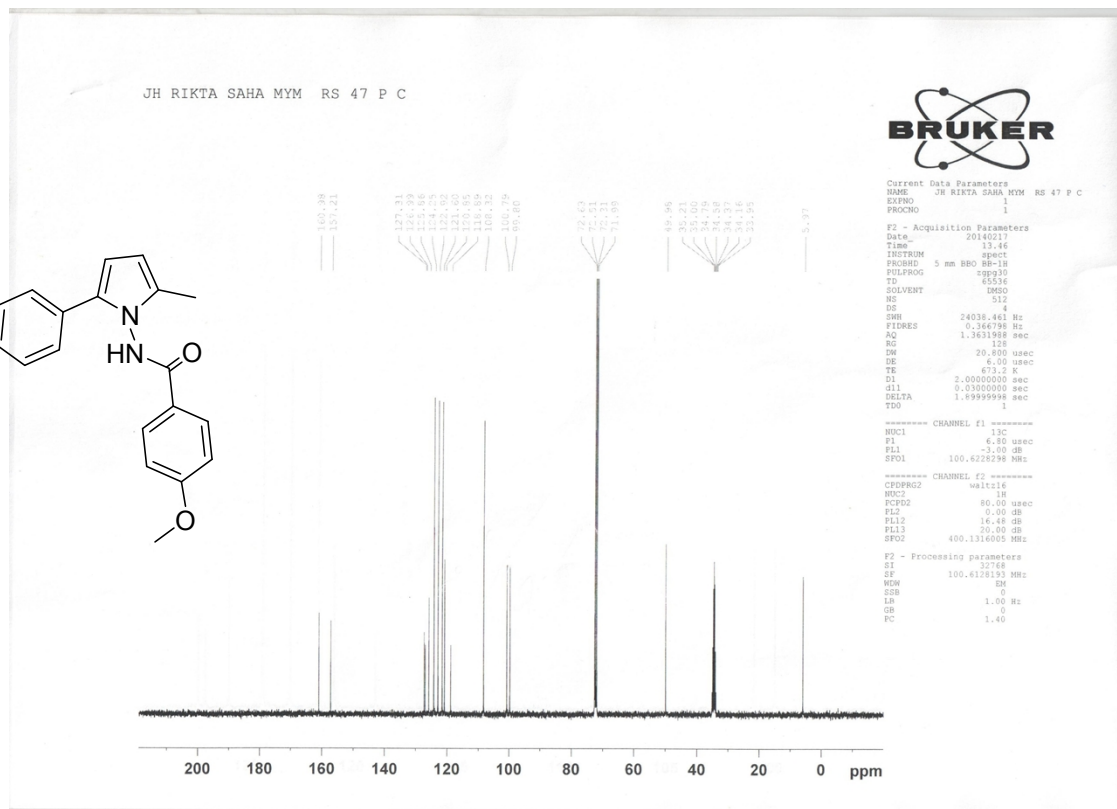

**Compound 8j** HPLC data of *4-Methoxy-N-(2-methyl-5-phenyl-1H-pyrrol-1-yl)benzamide*

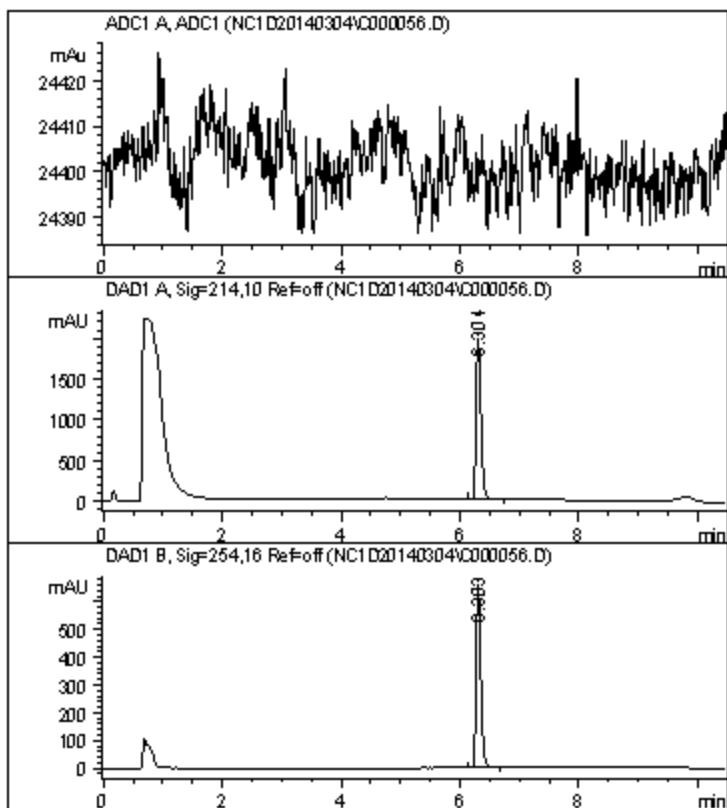

Compound 8k <sup>13</sup>CNMR *N*-(2-Methyl-5-phenyl-1*H*-pyrrol-1-yl)-2-phenylacetamide

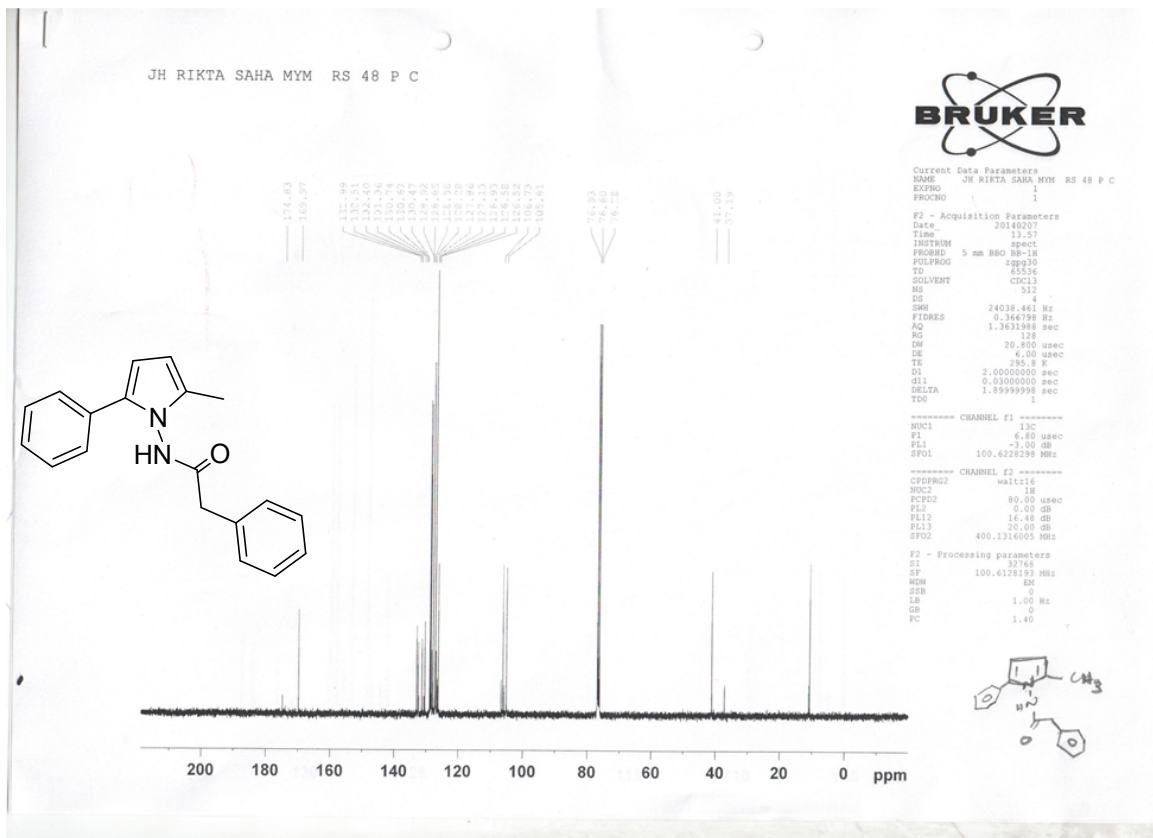

Compound 8k HPLC data of *N*-(2-Methyl-5-phenyl-1*H*-pyrrol-1-yl)-2-phenylacetamide

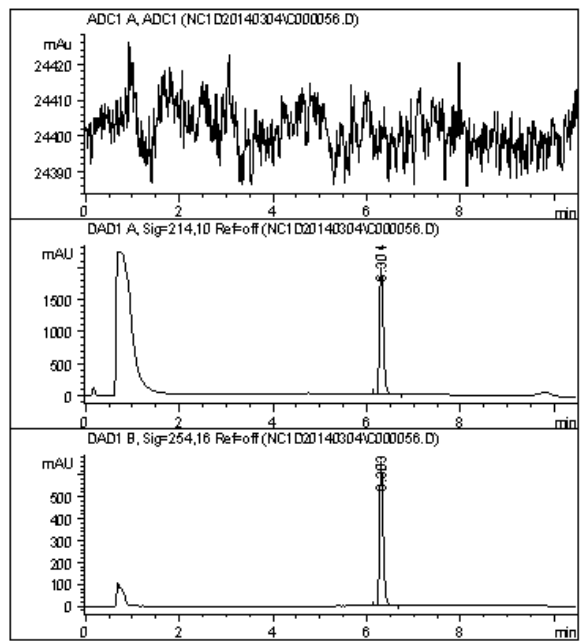

Compound 8o <sup>13</sup>CNMR of *N*-(2-Methyl-5-phenyl-1*H*-pyrrol-1-yl)-2-(*o*-tolyl)acetamide

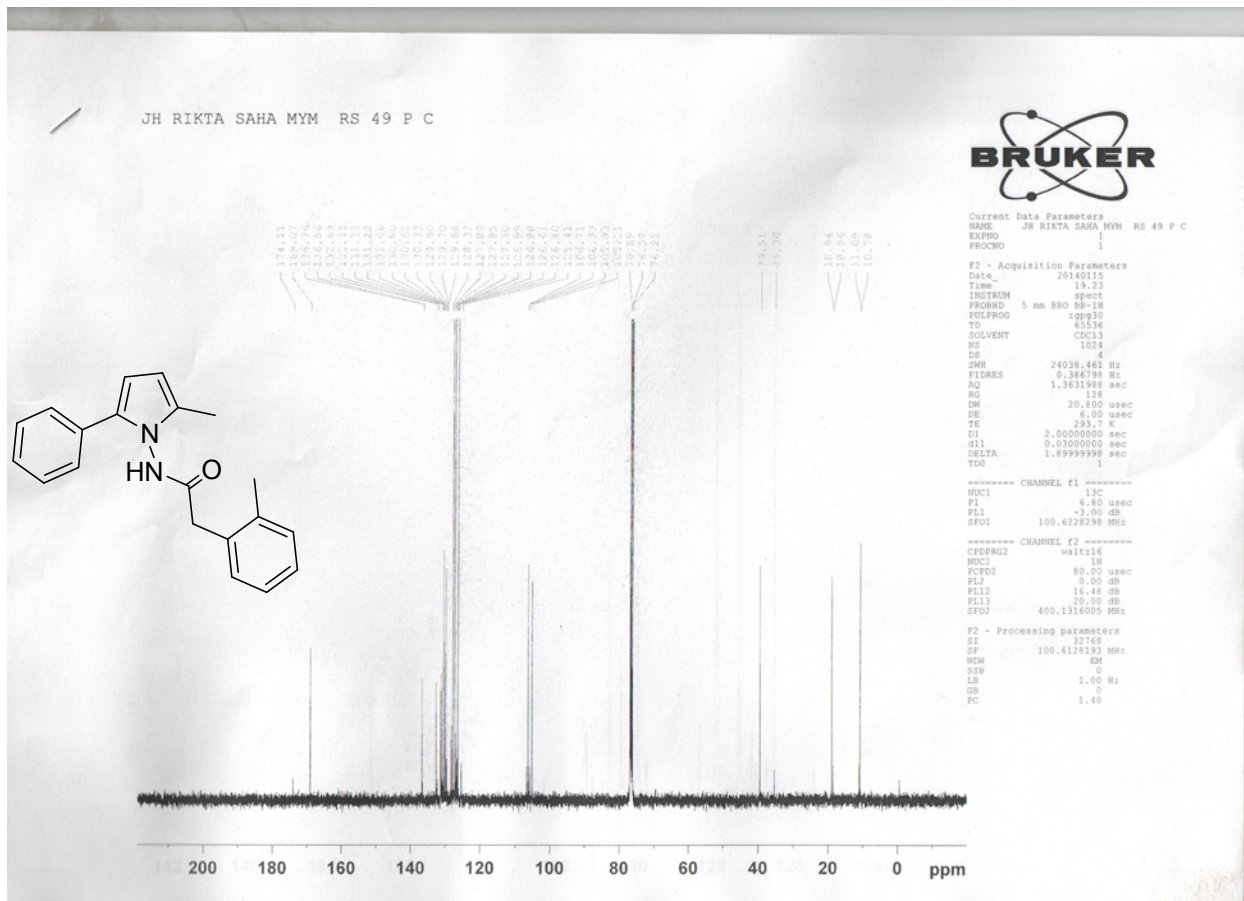

**Compound 8o** HPLC data of *N*-(2-Methyl-5-phenyl-1H-pyrrol-1-yl)-2-(*o*-tolyl)acetamide

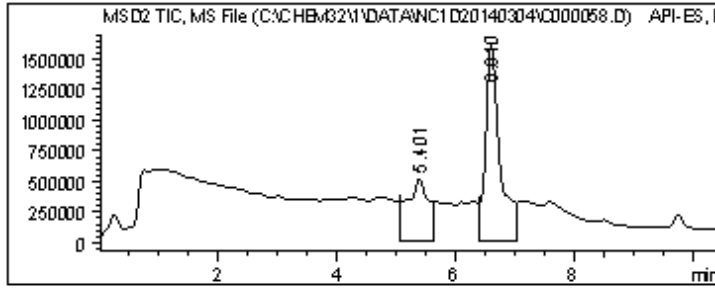

=====  
 Area Percent Report  
 =====

Sorted By : Signal  
 Multiplier : 1.0000  
 Dilution : 1.0000  
 Use Multiplier & Dilution Factor with ISTDs

Signal 1: ADC1 A, ADC1

Signal 2: DAD1 A, Sig=214,10 Ref=off

| Peak #   | RetTime [min] | Type | Width [min] | Area [mAU*s] | Height [mAU] | Area %  |
|----------|---------------|------|-------------|--------------|--------------|---------|
| 1        | 5.341         | VV   | 0.0970      | 745.07306    | 107.28176    | 5.4920  |
| 2        | 6.545         | VV   | 0.0970      | 1.28215e4    | 2049.74414   | 94.5080 |
| Totals : |               |      |             | 1.35666e4    | 2157.02590   |         |

Signal 3: DAD1 B, Sig=254,16 Ref=off

| Peak #   | RetTime [min] | Type | Width [min] | Area [mAU*s] | Height [mAU] | Area %   |
|----------|---------------|------|-------------|--------------|--------------|----------|
| 1        | 6.545         | BB   | 0.0869      | 3419.17187   | 615.09943    | 100.0000 |
| Totals : |               |      |             | 3419.17187   | 615.09943    |          |
